# Supplementary material
Source: ML conference proceedings conference paper supplement (https://proceedings.neurips.cc/paper_files/paper/2022/hash/aed42bb2e45857928418e4fe23d8cbcb-Abstract.html)
Supplement: Supplementary file 1 [file aed42bb2e45857928418e4fe23d8cbcb-Supplemental-Conference.pdf]

---

# Human-Robotic Prosthesis as Collaborating Agents for Symmetrical Walking

---

**Ruofan Wu \***  
Arizona State University

**Junmin Zhong \***  
Arizona State University

**Brent Abraham Wallace**  
Arizona State University

**Xiang Gao**  
Arizona State University

**He Huang**  
North Carolina State University

**Jennie Si <sup>†</sup>**  
Arizona State University

## Abstract

This is the first attempt at considering human influence in the reinforcement learning control of a robotic lower limb prosthesis toward symmetrical walking in real world situations. We propose a collaborative multi-agent reinforcement learning (cMARL) solution framework for this highly complex and challenging human-prosthesis collaboration (HPC) problem. The design of an automatic controller of the robot within the HPC context is based on accessible physical features or measurements that are known to affect walking performance. Comparisons are made with the current state-of-the-art robot control designs, which are single-agent based, as well as existing MARL solution approaches tailored to the problem, including multi-agent deep deterministic policy gradient (MADDPG) and counterfactual multi-agent policy gradient (COMA). Results show that, when compared to these approaches, treating the human and robot as coupled agents and using an estimated human adaption in robot control design can achieve lower stage cost, peak error, and improved symmetry to ensure better human walking performance. Additionally, our approach accelerates learning of walking tasks and increases learning success rate. The proposed framework can potentially be further developed to examine how human and robotic lower limb prosthesis interact, an area that little is known about. Advancing cMARL toward real world applications such as HPC for normative walking sets a good example of how AI can positively impact on people’s lives.

## 1 Introduction

The concept, design, and applications of human-robot cooperation have advanced rapidly due to new demands in AI-enabled applications fueled by powerful deep learning and reinforcement learning algorithms [1, 2, 3]. Human-robot collaboration can take on a variety of forms depending on tasks to be solved, how information is shared [1, 2], and the nature of interaction [3]. Examples of complex collaborative tasks may include picking up or carrying objects together [4, 5], cooperating on a production line, in which cases a robot can learn to imitate human demonstrations [6, 7, 8]. Other application scenarios may include intermittent robotic correction of human driving, or vice versa [9]. In essence, most of these recent studies involve interactions between a human and a robot in a way such that there is either space between the agents, or there is time for predictive counter measures to interfere. By contrast, in the HPC problem the human and robot agents are physically coupled together, and there is often little time for the human agent to react to prevent from falling or injury.

---

\*Equal Contribution.

<sup>†</sup>Corresponding author: [si@asu.edu](mailto:si@asu.edu)

As a result, innovative solution frameworks are needed to first address the design, analysis, and testing of complex control systems to restore locomotion for amputees. Based on these platforms, human-robot interactions can be studied, and fundamental issues such as user preference and prosthesis embodiment can be examined. The knowledge in turn, will further help design seamless automatic robot control systems. As such, challenges arising from controlling a wearable robotic lower limb prosthesis to meet the human user’s needs are unique, and in some aspects, these challenges are greater than what have been studied [10, 11, 12, 13].

State-of-the-art automatic control of robotic prosthesis has been reported recently with successful human subject testing [14, 15, 16, 17]. These approaches are single agent-based reinforcement learning controls, specific tasks such as level ground and ramp walking were accomplished via designer prescribed or specified robotic joint movement profiles [14, 15]. A most recent progress in single-agent based reinforcement learning solution demonstrated that human amputee subject can perform level ground and ramp walking with the robot controller aimed at mimicking the intact joint movement [17]. Note, however, that all previous results have not directly considered human influence on the human-robot system performance in tuning the robotic prosthesis controller, a phenomena that has direct impact not only on restoring walking but also on human health [18].

Achieving normative walking is fundamentally a real time control problem that involves continuous states and continuous controls of the human-robot system. Continuous state and control problem has received great attention. Approaches based on (deep) reinforcement learning have shown promise to substantively address real world applications. Several algorithms, such as Deep Deterministic Policy Gradient (DDPG) [19], Proximal Policy Optimization (PPO) [20], Soft Actor-Critic (SAC) [21], and Twin Delayed DDPG (TD3) [22], have demonstrated success with solving complex control problems. For example, in simulated human locomotion control [23, 24], deep reinforcement learning solved over 20 independent control signals to facilitate a humanoid robot to achieve different walking tasks. Additional single agent-based continuous control has also demonstrated promise in engineering applications such as stabilization, tracking, and reconfiguring control of Apache helicopters [25, 26, 27], stabilization and control of large power grids [28, 29, 30], robotic manipulation and locomotion via MuJoCo and OpenAI Gym [31, 32], and wearable robots with human in the loop [14, 15, 16, 17].

While these works are encouraging toward solving realistic single-agent continuous control problems, it is not obvious how they can directly address the multi-agent human-robot normative walking problem as needed when we consider human influence in the robot control design. From a physical human-robot interaction (pHRI) perspective, robotic upper-limb control has undergone intense development, especially in the realms of patient rehabilitation [33] and industrial applications [34]. However, this type of pHRI problems differ fundamentally from the human-robot walking problem, as their control target usually consists of well-defined end points generated by a decoupled trajectory generation exosystem [35]. On the other hand, human-robot walking tasks are difficult to associate with an end point task goal due to tight dynamic coupling between the human and the robotic lower limb, and many factors can affect the human’s performance goal. As such, even though multi-agent reinforcement learning (MARL) control is a natural candidate to address our HPC challenge, a feasible solution is yet to be developed.

## 2 Related Work and Challenges

**Single agent RL for automatic control of a robotic limb.** Simulation. Most state-of-the-art RL control design approaches to enable continuous human-robot walking are single-agent based. Important milestones have been achieved by two major classes of RL algorithms: actor-critic algorithms including direct heuristic dynamic programming (dHDP) [36, 37, 38, 39], and variants of policy iteration algorithms such as flexible policy iteration (FPI) [40]. Both types of single-agent based control algorithms were developed and demonstrated in simulated environments first. Human Tests. Then these algorithms were tested on human subjects walking with a robotic knee prosthesis [15, 16, 41]. Note that all of the above methodologies and tests used designer-prescribed robot joint movement profiles generated *a priori* for the specific subjects and walking tasks. In real-world use scenarios, joint movement profiles evolve dynamically in real-time to accommodate internal human walking objectives [14, 42]. A more recent single-agent RL control work [17] replaced designer-prescribed joint movement profiles with the intact joint motion. Note also that, none of the above results have directly taken into account human influence on human-robot walking in the control design, a novel contribution of this work. **Multi-agent reinforcement learning (MARL).**

A general cMARL problem usually cannot be transformed to an equivalent single-agent problem, as additional agent(s) and their control policies introduce uncertainties and/or non-stationarity to the environment [43]. Partial observability is common in cMARL problems, which are usually addressed by the decentralized POMDP framework. Centralized training decentralized execution (CTDE) is a popular paradigm to address multi-agent coordination problems. A central feature of most CTDE approaches is factorization of the joint state-action value function into individual utility functions. **MADDPG** [44] is a popular CTDE-based method to solve both cooperative and competitive MARL problems. **COMA** [45] is another popular MARL algorithm which utilizes a single centralized critic by using global state information and actions of all agents. We therefore use them in benchmark evaluations. **Shared Autonomy (SA)**. The human-prosthesis problem under our consideration falls into the area of physical human-robot interaction (pHRI) as the human and the robotic prosthesis are physically coupled at all times. It is not, however, the extensively studied pHRI problem archetype (e.g., cooperative object manipulation, human operating in a remote environment), wherein interactions are usually mediated by a third object. For similar reasons, our pHRI problem is different in several important aspects from the approaches to the existing shared autonomy, such as cross-training [46], bounded memory adaptation [47], predict and blend [48], and model-free RL [49]. The wearable exoskeleton control problem seems relevant to our HPC problem. Yet, there are still fundamental differences. Recent exoskeleton approach also takes into account human-exoskeleton interacting effects [50, 51]. However, these exoskeletons mainly focus on end point performance of a foot or lower limb joints where user intent is quantified by estimating human joint torque or interactive torque. Thus, human-exoskeleton system performance goal is for the robot to produce a well-defined joint or endpoint trajectory [52, 53, 54]. For HPC problem we consider, there is no clear end point goal as there is in most existing current pHRI problems, including robotic upper limb that has been intensively addressed in literature. Therefore, how to define a performance goal for our HPC problem is a challenge. We address this study from existing limited yet proved knowledge [14, 42, 55]. **Modeling Challenges**. The HPC walking problem involves two strongly coupled agents, the interacting dynamics of which are difficult or nearly impossible to describe by ordinary difference or differential equations in large part because there is no clear performance goal in HPC as in studied cases of shared autonomy. HPC may be affected by several factors, such as lower limb mechanics, inter-limb neuromechanical coupling, and physical structure of the human body including the lower limb [56, 57]. Physical and physiological differences in individual human subjects further complicates modeling and control design. Even though our knowledge of human motor control and motor learning in cases such as post-stroke or general loss of normative locomotion capabilities have expanded greatly [58], little is known about how an active robotic prosthesis, not a traditional stick-type passive prosthesis, affects human and vice versa in walking tasks. This is because that the human-robotic prosthesis interacts continuously, the intricate human neurocontrol circuits including sensing, perception and feedback control, which are necessary to facilitate normative walking, is disrupted after amputation. **Human Utility Challenges**. Because of the reasons above, also because of no clear end point target as performance goals as in most studied shared autonomy cases, seamless collaboration between a robotic lower limb prosthesis serially attached to its human user poses new issues that requires to be answered [10, 11]. In this study, we based on latest understanding on the HPC problem, to provide an innovative solution approach to account for human influence in HPC.

**Contributions.** Human-robot collaborative tasks will continue to play an increasingly vital role in modern life, and existing single- and multi-agent control frameworks have only covered a small subset of the problems. The contributions of this work are as follows. 1) We introduce an innovative approach to automatically control a robotic lower limb prosthesis by treating the human user as a collaborating agent. We thus address a new challenge in the domain of shared autonomy problems. 2) To solve the control problem, we introduce a new cMARL approach to solve our HPC problem, a problem that cannot be readily solved to satisfaction by existing MARL approaches such as COMA or MADDPG. 3) This is the very first attempt in the field of wearable lower limb robots that human influence is explicitly considered in the robot control design.

### 3 Fundamental control problem statement

In powered lower limb prosthesis, the finite state impedance control (FS-IC) framework most frequently serves to provide intrinsic control of a robotic joint, i.e., it is the built-in controller from robotic prosthesis manufacturers. While position control is common in industrial robots, when a human is affixed to a robotic joint, robot trajectory tracking using position control may preclude any

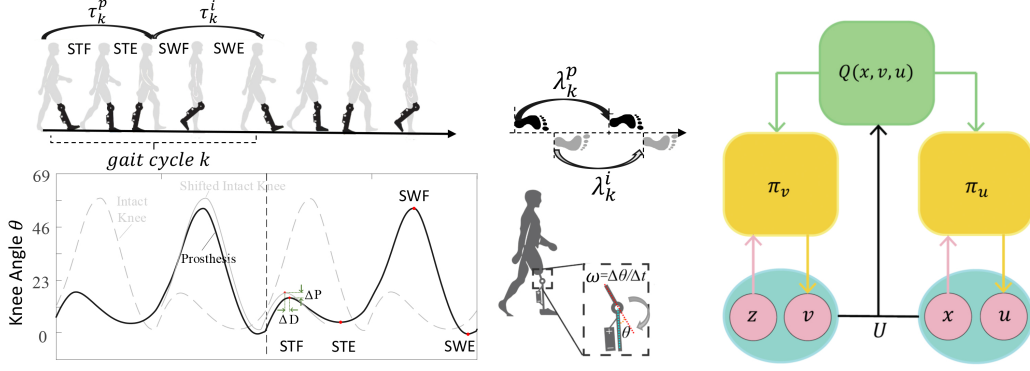

Figure 1: Left: human gait and prosthesis FS-IC characteristics. Right: cMARL solution approach to the HPC problem.

dynamic interaction of the robot with its human user and the environment [59]. This may cause an amputee to react to the awkwardness of the prosthesis rather than to interact constructively with it [60]. As FS-IC impedance control framework is considered to provide compliant control for human use of the robot, it is expected to generate stable and predictable human-robot walking behavior, and thus, it is adopted in this study which aims for its controller designs at real world applications.

The FS-IC treats a gait cycle, or a step, as four consecutive gait phases (Figure 1, Left): stance flexion (STF) as Phase 1, stance extension (STE) as Phase 2, swing flexion (SWF) as Phase 3, and swing extension (SWE) as Phase 4. In what follows, we design four individual controllers for each of the four phases. Since the four controllers are conceptualized similarly and designed using the same approach, for the sake of clarity we carry out subsequent discussion without explicitly referring to the specific phase numbers (but we emphasize that each of the four phases requires its own independently-trained controller). Additional details on FS-IC such as phase detection and transition are provided in Appendix A.3,

At the  $k$ -th gait cycle, a robot controller (solved by cMARL in this paper) is to determine three impedance parameters,  $I_k = [K_k, B_k, (\theta_e)_k]^T \in \mathbb{R}^3$  under the FS-IC framework, representing stiffness  $K_k$ , damping coefficient  $B_k$ , and equilibrium position  $(\theta_e)_k$ , respectively. The prosthetic joint motor torque  $T_k \in \mathbb{R}$  is then generated based on joint kinematics (knee joint angle  $\theta$  and angular velocity  $\omega$ ) according to the following impedance control law,

$$T_k = K_k(\theta - (\theta_e)_k) + B_k\omega. \quad (1)$$

The control problem formulation requires automatically determining 12 control inputs or impedance control parameters (3 for each of the 4 gait phases) for individual users aiming at walk in real world situations. The initial set of feasible baseline impedance control parameters  $I_0$  can be obtained from manufacturers or rehabilitation clinics. Impedance updates take place according to

$$I_{k+1} = I_k + u_k, \quad (2)$$

where  $u_k \in \mathbb{R}^3$  is to be determined from our proposed cMARL approach.

## 4 Method

The human user and the robotic limb are considered collaborating agents. Our cMARL solution approach toward human-robot symmetrical walking problem is formulated based on physical features and measurements that have been shown affecting human-robot walking performance, and they are respectively available to the human and the robot, but not necessarily to each other.

**State and control variables.** Refer to Figure 1. At the  $k$ -th gait cycle, let  $\tau_k^i$  and  $\lambda_k^i$ , respectively, represent the stance time (time of foot on the ground) and step length (length between two consecutive steps when toe touching the ground) of the human intact leg. Similarly,  $\tau_k^p$  and  $\lambda_k^p$ , respectively, for the prosthetic leg. Let  $\Delta\tau_k$ ,  $\Delta\lambda_k$  denote respectively the difference of stance time and step length,

$$\Delta\tau_k = \tau_k^p - \tau_k^i, \quad \Delta\lambda_k = \lambda_k^p - \lambda_k^i. \quad (3)$$

We thus define human state variable  $z_k \in \mathbb{R}^2$  as  $z_k = [\Delta\tau_k, \Delta\lambda_k]^T$ .

Robot states include kinematic features determined from the knee movement profiles as well as step length and stance time (or  $z_k$ ). For robot kinematic state variables, we extract gait kinematic features from knee motion profiles of both limbs (Figure 1). Let  $P_k^i$  and  $D_k^i$  represent the knee angle and time duration of the intact limb, and similarly,  $P_k^p$  and  $D_k^p$  for the prosthetic limb. Let  $\Delta P_k$  and  $\Delta D_k$  denote the error of peak knee angles and the error of duration time between the intact and the robotic knees, respectively,

$$\Delta P_k = P_k^p - P_k^i, \Delta D_k = D_k^p - D_k^i. \quad (4)$$

We then define robot state  $x_k \in \mathbb{R}^4$  to include the following four variables, the first two of which are shared between the human and the robot,  $x_k = [\Delta\tau_k, \Delta\lambda_k, \Delta P_k, \Delta D_k]^T$ .

As such, human states are available to the robot, but a subset of the robot state (the kinematic features) is not available to the human. This reasonably reflects practical situations in real life applications.

The robot control policy is a state feedback law from robot state to robot impedance control parameters, namely, control  $u_k$  consists of increments to the impedance control parameters (Eq. 2),

$$u_k = [\Delta K_k, \Delta B_k, (\Delta\theta_e)_k]^T. \quad (5)$$

Determining human control policy which originates from human neurocontrol circuit is a daunting task, especially now that sensing, perception and feedback control circuits are interrupted after a lower limb amputation. While agents' policy solutions are solved from Bellman optimality-like equations, a human cannot interpret and implement an MARL solution via their complicated neural circuits. But this is not our intention. We instead use the human control variable as an estimated input to the robot controller design, i.e., the robot is informed by an estimated human influence when they share the same goal of symmetrical walking.

As the very first step to demonstrate this idea, we consider the human user of the wearable robot intentionally or voluntarily walk at a reference step length, which may also be from an instructional feedback. For real life scenarios, such behavioral cues can change over time, task, or environment. But it is important to validate such formulation of considering human influence in the robot control design. Toward this end, we consider a practical reference cue denoted as a desired step length  $\lambda_o$ . We let  $v_k$  represent an endogenous control signal of the human which is a function of human physical and mental states that involve activities ranging from neural level to muscular and joint level. Accordingly, we represent the endogenous human influence solved from the MARL design as a step length  $\lambda_k^d$ . We therefore define human control as,

$$v_k = \lambda_k^d - \lambda_o. \quad (6)$$

Including this estimated human control into the problem of robot control design, we take into account human influence on human-robot walking performance while they share the same symmetrical walking goal.

### Symmetrical walking as shared task goal.

We consider the stage cost to be shared between the human and the robot.

$$U(x_k, v_k, u_k) = x_k^T R_x x_k + R_v v_k^2 + u_k^T R_u u_k + \mu h_k^2, \quad (7)$$

where  $R_x \in \mathbb{R}^{4 \times 4}$  and  $R_u \in \mathbb{R}^{3 \times 3}$  are positive semi-definite weighting matrices,  $R_v$  and  $\mu$  are positive weighting constants, and  $h_k = v_k - \bar{v}_k$ . In the above, the difference between actual human step length  $\lambda_k^i$  and reference  $\lambda_o$ , denoted as  $\bar{v}_k = \lambda_k^i - \lambda_o$ , is considered practical and available.

In this formulation, the shared control objective is represented in two ways. First, the robot kinematic state variables in  $x_k$  are to match the intact knee, i.e., the robotic joint angle profile is to match that of the intact joint. Additionally, a walking symmetry measure is directly considered by the differences in step length and stance time between human and robot, commonly used gait symmetry measures [61, 62, 63]. The human is assumed to perceive the gait symmetry but do not have access to or understand robot kinematic data (peak knee deflection error  $\Delta P_k$  and peak knee time error  $\Delta D_k$ ). The works [14, 64] show from test subject data that human control and adaptation has a direct influence on robot kinematics through dynamic interactions [59]. To account for this dynamic learning phenomenon, this framework penalizes the estimation error  $h_k = v_k - \bar{v}_k = \lambda_k^d - \lambda_k^i$

between human perceived difference in step length. An unexpected or undesired human action will increase the cost represented by  $h_k$ , while a diminishing  $h_k$  indicates that human input that originated from the neuromuscular system matches actual human performance. Minimal controller energy expenditures are also included in the cost structure.

The human-robot control objective to be solve by MARL as a function of the state variables and the the controls is formulated as an infinite horizon, discounted cost  $Q(x_k, v_k, u_k) = \sum_{j=k}^{\infty} \gamma^{j-k} U(x_j, v_j, u_j)$  where  $\gamma$  ( $0 < \gamma < 1$ ) is the discount factor for the infinite-horizon problem.

**Solutions to control actions.** Let  $v_k = \pi_v(z_k)$  and  $u_k = \pi_u(x_k)$ , where  $\pi_v$  and  $\pi_u$  are the human and the robot control policies solved from cMARL, respectively. Solving optimal control policies  $\pi_v^*$  and  $\pi_u^*$  requires solving the optimal  $Q$  function that satisfies Bellman optimality equation:

$$Q^*(x_k, v_k, u_k) = U(x_k, v_k, u_k) + \gamma Q^*(x_{k+1}, \pi_v^*(z_{k+1}), \pi_u^*(x_{k+1})). \quad (8)$$

When using a neural network-based actor-critic solution framework, we approximately solve the optimal control problem using the following iterative procedure ( $i$  is the iteration index),

$$Q_{i+1}(x_k, v_k, u_k) = U(x_k, v_k, u_k) + \gamma Q_i(x_{k+1}, \pi_{v_i}(z_{k+1}), \pi_{u_i}(x_{k+1})). \quad (9)$$

where  $\pi_{v_i}(z_k) = \arg \min_{v_k} Q_i(x_k, v_k, u_k)$ , and  $\pi_{u_i}(x_k) = \arg \min_{u_k} Q_i(x_k, v_k, u_k)$ , and  $Q_i(x_k, v_k, u_k)$  are iterative actor policies and iterative  $Q$  value function.

During training, the actor and critic back-propagate their respective squared error to update their weights. The prediction error of actor  $e_{a_v,k}, e_{a_u,k} \in \mathbb{R}$  is,

$$e_{a_v,k} = e_{a_u,k} = \frac{1}{2} (Q_i(x_k, v_k, u_k))^2. \quad (10)$$

The prediction error for the critic  $e_{c,k}$  is formulated based on the Bellman error,

$$\epsilon_{c,k} = U + \gamma Q_i(x_{k+1}, \pi_{v_i}(z_{k+1}), \pi_{u_i}(x_{k+1})) - Q_{i+1}(x_k, v_k, u_k), \quad (11)$$

and the critic neural network is trained to minimize  $e_{c,k} = \frac{1}{2} \epsilon_{c,k}^2$ .

The optimal state-action cost-to-go function  $Q^*(x_k, v_k, u_k)$  is approximated by a critic neural network which learns the  $Q$  function by minimizing the Bellman error on the shared cost signal, not on a local cost signal for either the human or the robot as the human and the robot are physically coupled. We use our established direct heuristic dynamic programming (dHDP) algorithm [36] to solve this approximation dynamic programming problem. The critic neural network is a three-layer MLP with 6 hidden units and uses linear activation function in the output layer. Therefore, we have the approximated cost to go value represented by:

$$\hat{Q}_i(x_k, u_k) = W_{c2,i} \varphi \left( W_{c1,i} [x_k^T, u_k^T]^T \right), \quad (12)$$

where  $W_{c1,i} \in \mathbb{R}^{6 \times 8}$  denotes the weight matrix between the input layer and the hidden layer, and  $W_{c2,i} \in \mathbb{R}^{1 \times 6}$  the weight matrix between the hidden layer and the output layer during the  $i$ th learning update. The weight updates of the hidden layer matrix  $W_{c2}$  are according to

$$\Delta W_{c2,i} = l_c \left[ -\frac{\partial e_{c,k}}{\partial W_{c2}} \right], \quad (13)$$

and the weight updates of the input layer matrix  $W_{c1}$  are according to

$$\Delta W_{c1,i} = l_c \left[ -\frac{\partial e_{c,k}}{\partial W_{c1}} \right], \quad (14)$$

where  $l_c > 0$  is the learning rate of the critic network.

Similar to the critic network, the actor networks for the human and the robot, respectively are three-layer MLP with 6 hidden units with hyperbolic activation function in the output layer to bound the action output. The same SGD optimizer [36] can be applied to the actor networks as well.

The two actors,  $u$  and  $v$ , respectively are

$$\begin{aligned} u_k &= \varphi(W_{a_u2,i} * \varphi(W_{a_u1,i} x_k)), \\ v_k &= \varphi(W_{a_v2,i} * \varphi(W_{a_v1,i} z_k)), \end{aligned} \quad (15)$$

where  $W_{a_u1} \in \mathbb{R}^{6 \times 4}$ ,  $W_{a_v1} \in \mathbb{R}^{6 \times 2}$ ,  $W_{a_u2} \in \mathbb{R}^{3 \times 6}$  and  $W_{a_v2} \in \mathbb{R}^{1 \times 6}$  are the weight matrices, and  $\varphi(\cdot)$  is the hyperbolic tangent activation function used in the hidden layer and the output layer. The weight updates of the hidden layer matrix  $W_{a2,i}$  are according to

$$\begin{aligned}\Delta W_{a_u2,i} &= l_a \left[ -\frac{\partial e_{a_u,k}}{\partial W_{a_u2,i}} \right], \\ \Delta W_{a_v2,i} &= l_a \left[ -\frac{\partial e_{a_v,k}}{\partial W_{a_v2,i}} \right].\end{aligned}\tag{16}$$

The weight updates of the input layer matrix  $W_{a1,i}$  are according to

$$\begin{aligned}\Delta W_{a_u1,i} &= l_a \left[ -\frac{\partial e_{a_u,k}}{\partial W_{a_u1,i}} \right], \\ \Delta W_{a_v1,i} &= l_a \left[ -\frac{\partial e_{a_v,k}}{\partial W_{a_v1,i}} \right],\end{aligned}\tag{17}$$

where  $l_a > 0$  is the learning rate of the actor.

Further details on the cMARL automatic control solution are provided in Appendix D.

## 5 Experiment

We conduct design evaluations of the proposed cMARL for symmetrical walking using OpenSim, a well-established open source biomechanical modeling tool for conducting biomechanics research and motor control science [65]. The robot knee control is realized within an FS-IC framework. In real life, initial impedance parameters can be selected based on manufacturer and/or rehabilitation clinician's recommendations. Similar care is given to OpenSim simulated walking yet in all evaluations, the initial impedance values vary from a large range of settings for fair examination. As in [37], we enforce realistic safety constraints to prevent the human from stumbling or falling. Impedance parameters are reset to initial impedance values if any of the state variables exceed the safety bounds. The safety protocols followed in this work are fully described in Appendix A.4.

To make the simulations reflective of real world conditions, sensor and actuator noise data extracted from real human experimental testing sessions is applied to all the simulations in this study. Appendix A.2 provides the complete procedure followed of extracting noise data from experiments involving human subjects and injecting it into all the simulations.

In this section, we provide results of a large set of simulation studies aiming at answering the following questions: 1) Does our cMARL solution framework provide better performance than state-of-the-art baselines, including MADDPG and COMA? 2) Does including human influence in robot control design accelerate learning and improve success rate of policy in comparison to single-agent based approach (wout/human)? 3) Is our cMARL applicable to different and realistic walking tasks? To provide answers, we show three sets of evaluations: benchmark, ablation and reliability. Benchmark and ablation evaluations are based on a level ground walking task with a pace of 1m/s. Reliability evaluations are based two new walking tasks: slope walking on a 11.5 degree ramp and level ground walking at an increased pace of 1.12m/s.

**Performance Criteria.** In order to ensure that amputee subjects walk safely and continuously, we consider several performance metrics: 1) As an optimal control problem, the objective is to minimize state regulation cost (smaller is better). 2) Peak knee error can directly reflect amputee safety, preventing falling and stumbling (smaller is better). 3) Symmetry in walking can prevent secondary injury (closer to 0 is better). 4) Fast learning in terms of fewer tuning steps is practically important to amputees (fewer steps is better). 5) High success rate boosts amputees' confidence and hence walking performance (higher is better). Details of how the data was obtained can be found in Appendix E.2. The main evaluation results are presented in Table 1. The second value in each entry (i.e., after the  $\pm$  symbol) represents the standard deviation of the performance metrics.

**Benchmark study.** MADDPG and COMA differ from our proposed cMARL approach toward symmetry walking. MARL problems can vary greatly, same are expected of their solutions [66, 67].

To perform benchmark studies, we tailor MADDPG and COMA, respectively to our HPC problem. Details are provided in Appendix D.

Table 1: Performance of the implemented algorithms in terms of the five performance criteria. The results of the best-performing algorithm for each criterion are boldfaced

| Performance    | w/human                             | wout/human        | COMA              | MADDPG            |
|----------------|-------------------------------------|-------------------|-------------------|-------------------|
| Stage Cost     | <b><math>0.002 \pm 0.001</math></b> | $0.008 \pm 0.003$ | $0.004 \pm 0.002$ | $0.38 \pm 0.306$  |
| Peak Error     | <b><math>0.003 \pm 0.001</math></b> | $0.007 \pm 0.002$ | $0.003 \pm 0.001$ | $0.025 \pm 0.014$ |
| Symmetry       | <b><math>0.001 \pm 0.001</math></b> | $0.006 \pm 0.003$ | $0.003 \pm 0.002$ | $0.022 \pm 0.012$ |
| Converge Steps | <b><math>97 \pm 88.3</math></b>     | $187.5 \pm 105.2$ | $136 \pm 121.8$   | —                 |
| Success Rate   | <b>0.7</b>                          | 0.58              | 0.5               | —                 |

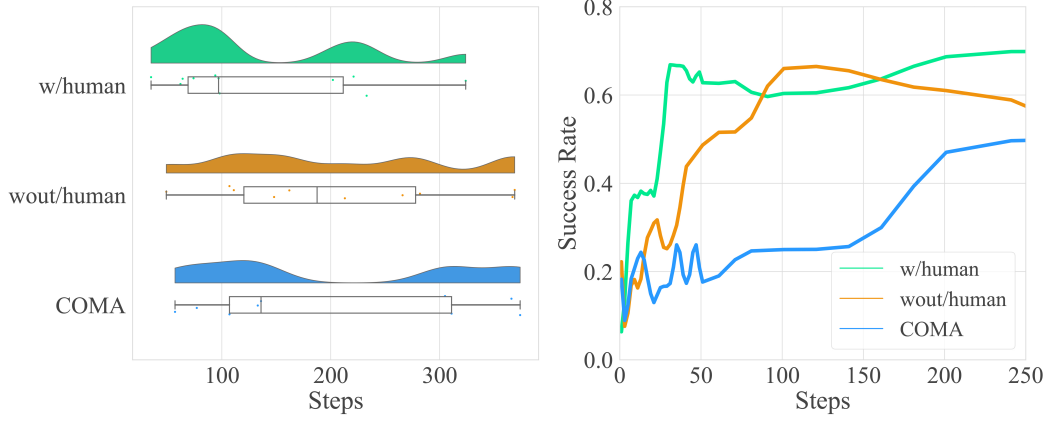

Figure 2: The total number of steps needed to reach convergence in training (left). The success rate during evaluation (right).

Figure 2 shows that our cMARL solution has the best convergence profile and success rate over the baselines. Further results on training and evaluation are shown in Figures 3 and 4 which compare the environment sample efficiency as well as algorithm performances. To answer the first question based on benchmarking, our cMARL solution outperforms the baselines both in terms of kinematic and symmetry measurements as shown in Figures 3 and 4, center and right panels for training and evaluation, respectively. Additionally, the left panels of Figures 2, 3 and 4 show that our cMARL solution outperforms benchmarks with at least 30% less environment samples.

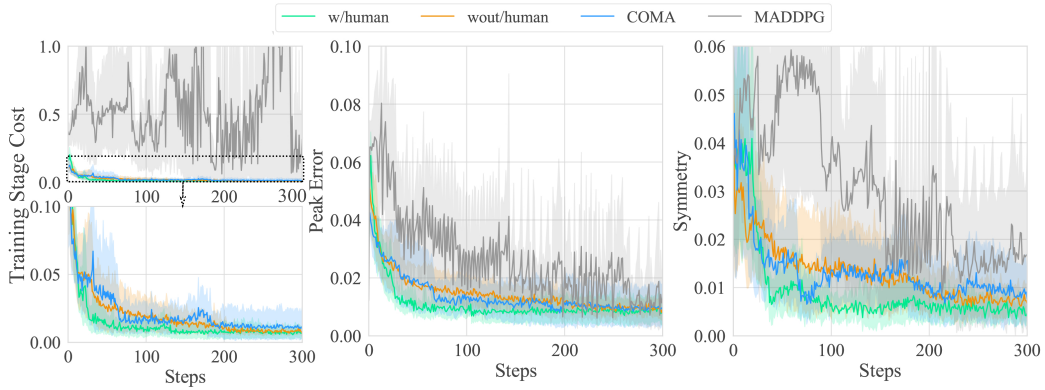

Figure 3: Learning curves of stage cost during training (left), peak angle error (middle) and symmetry of step length (right) for benchmark (w/human, COMA, MADDPG) and ablation (w/human, wout/human) studies. Each learning curve is averaged over 16 different random seeds and shaded by their respective 95% confidence interval.

**Ablation study.** To gain insights on how human control influences human-robot walking performance, an ablation study is carried out with direct human influenced terms removed, including  $h_k$  and  $v_k$ ,

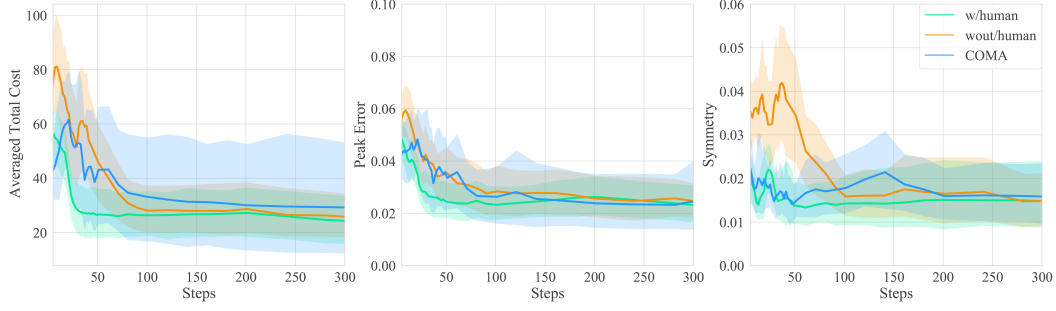

Figure 4: Learning curves of averaged total cost (terms associated with human influence removed) during evaluation (left), peak angle error (middle) and symmetry of step length (right) for benchmark (w/human, COMA) and ablation (w/human, wout/human) studies. Each (smoothed) learning curve is averaged over 5 different random seeds and shaded by their respective 95% confidence interval.

from the problem formulation. This only leaves the kinematics and symmetry measurements in the stage cost. Similar to the benchmark study, the ablation study has a training session and evaluation session. For comparable results, the total cost in evaluation is obtained as  $U = (x)^T (R_x) x + u^T R_u u$ . Figures 3 and 4 show that with an estimated human control influence accounted for in the robot control design, our cMARL solution (the green curves) outperforms the one without it (orange curves). Treating human and robot as collaborating agents toward a shared performance goal, our cMARL solution approach achieves increased success rate and accelerated learning speed (Figure 2). This result makes sense as an estimated human control provides a predictive signal to the robot control which aims at duplicating the intact human joint movement. Additional information on the quality of estimated human control is given in Appendix B.2.

**Reliability study.** To make the proposed cMARL method practical and useful in real life, we setup two new walking tasks: (1) slope walking (11.5 degree ramp) and (2) walking at an increased pace (1.12m/s). They will result in different walking patterns from those used in the baseline study, and thus different knee joint profiles. For slope walking, knee flexion will be more pronounced during the stance phase since it walks inclined. In the case of faster pace, stance time will be compressed. To carry out the tests, the same training procedure is used as in benchmark and ablation studies.

Figure. 5 shows the performance of cMARL during slope walking and increased pace walking tasks. Performance of the two new tasks follow the same trend as that of the level ground walking at a nominal pace. These results again validate our design approach of using the intact knee movement trajectory as the target for the robotic knee to copy. By doing so, we have removed a major control design barrier in the way of performing different walking tasks by automatic control.

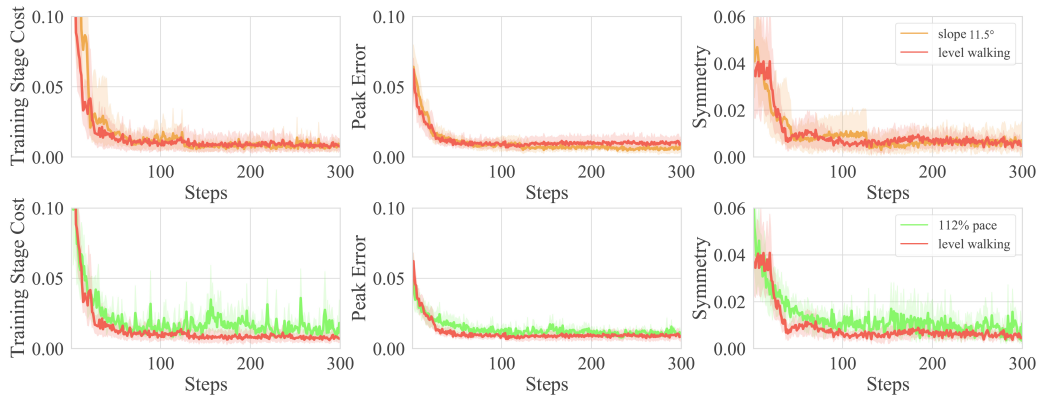

Figure 5: Learning curves of stage cost during training (Left), peak angle error (Middle) and symmetry of step length (Right) for different walking tasks (level ground walking at increased pace and ramp walking). Each learning curve is averaged over 16 different random seeds and shaded by their respective 95% confidence interval.

**Limitations of This Study.** Here we conduct an in-depth simulation-based analyses as an important first step to evaluate this novel cMARL solution to the HPC problem. Simulations are critically important as exploration of problem formulation, control algorithm design, and systematic evaluation are necessary to be performed prior to human experiment due to factors such as human fatigue, human safety, human loss of interest/confidence caused by repeated trial-and-error, time spent, and significant cost associated with testing amputee subjects. However, our framework is still to be tested in human experiment. Based on several important works in the literature [37, 40, 68, 69], extensive simulation studies followed by real life human test studies [41, 17, 70] have proven a highly successful development procedure for human/robot control. This will be the next step of this study.

For scenarios in which the terrain or task has changed significantly, a task planner will become necessary, making the problem a planning and control problem (as opposed to automatic control, the focus of this work). This expanded automatic control algorithm must be extensively verified in simulation and then in human tests before it can be integrated into a real-world planning framework for daily use cases. Such planning frameworks constitute intended future works.

## 6 Conclusion and discussion

1) In the US, approximately 1.7 million people live with limb loss. The amputee population is expected to double by 2050 as the population ages and incidence of dysvascular disease increases. As most lower limb amputees use prosthetic legs to restore basic bipedal locomotion, our solution to the prosthesis control problem can potentially help improve the function and quality of life of lower limb amputees. 2) In this work, we develop a novel cMARL framework towards systematically integrating the human and robot as collaborative agents to achieve normative walking toward solving real world problems. With reaching symmetric locomotion as shared control performance goal, we demonstrate improved walking performance. 3) Symmetry is selected as the shared goal for the collaborating agents because asymmetric walking has been linked to secondary health complications including back pain and osteoarthritis [71, 72, 73]. Although human-robot walking performance goals are difficult to systematically catalogue, additional considerations such as embodiment of the robot into the human will be considered in future works. 4) By breaking apart the shared cost for the human and the robot (cf. Section 5.1), the symmetrical walking task is treated and evaluated by MADDPG and COMA, respectively. Simulation results show that the factorization-based CTDE paradigm struggles to address the human-robot problem. The observed performance issues with factorization likely stem from the intrinsic coupling between the human and robot agents. 5) While ensuring human user safety has been carefully considered during control design, additional analysis of important properties such as convergence of learning, (sub)optimality of control policy, and human-robot closed-loop stability is still needed for this framework. Encouragingly, previous related works [74, 75, 76, 77] indicate that these theoretical results are very likely to be provable.

## 7 Acknowledgments and Disclosure of Funding

This research was supported in part by NSF under grants 1563921, 1808752 and 2211740 for Si; grants 156454, 1808898 and 2211739 for Huang. Zhikai Yao participated in early stage discussion involving the formulation of shared performance goal.

## References

- [1] Julian Schrittwieser, Ioannis Antonoglou, Thomas Hubert, Karen Simonyan, Laurent Sifre, Simon Schmitt, Arthur Guez, Edward Lockhart, Demis Hassabis, Thore Graepel, et al. Mastering atari, go, chess and shogi by planning with a learned model. *Nature*, 588(7839):604–609, 2020.
- [2] David Silver, Julian Schrittwieser, Karen Simonyan, Ioannis Antonoglou, Aja Huang, Arthur Guez, Thomas Hubert, Lucas Baker, Matthew Lai, Adrian Bolton, et al. Mastering the game of go without human knowledge. *Nature*, 550(7676):354–359, 2017.
- [3] Volodymyr Mnih, Koray Kavukcuoglu, David Silver, Andrei A Rusu, Joel Veness, Marc G Bellemare, Alex Graves, Martin Riedmiller, Andreas K Fidjeland, Georg Ostrovski, et al. Human-level control through deep reinforcement learning. *Nature*, 518(7540):529–533, 2015.

- [4] Martin Lawitzky, Alexander Mörtl, and Sandra Hirche. Load sharing in human-robot co-operative manipulation. In *19th International Symposium in Robot and Human Interactive Communication*, pages 185–191. IEEE, 2010.
- [5] Antoine Bussy, Pierre Gergondet, Abderrahmane Kheddar, François Keith, and André Crosnier. Proactive behavior of a humanoid robot in a haptic transportation task with a human partner. In *2012 IEEE RO-MAN: The 21st IEEE International Symposium on Robot and Human Interactive Communication*, pages 962–967. IEEE, 2012.
- [6] Hongbo Wang and Kazuhiro Kosuge. Control of a robot dancer for enhancing haptic human-robot interaction in waltz. *IEEE transactions on haptics*, 5(3):264–273, 2012.
- [7] David Vogt, Simon Stepputtis, Steve Grehl, Bernhard Jung, and Heni Ben Amor. A system for learning continuous human-robot interactions from human-human demonstrations. In *2017 IEEE International Conference on Robotics and Automation (ICRA)*, pages 2882–2889. IEEE, 2017.
- [8] Shuhei Ikemoto, Takashi Minato, and Hiroshi Ishiguro. Analysis of physical human–robot interaction for motor learning with physical help. *Applied Bionics and Biomechanics*, 5(4):213–223, 2008.
- [9] Biao Ma, Yulong Liu, Xiaoxiang Na, Yahui Liu, and Yiyong Yang. A shared steering controller design based on steer-by-wire system considering human-machine goal consistency. *Journal of the Franklin Institute*, 356(8):4397–4419, 2019.
- [10] Dylan P Losey, Craig G McDonald, Edoardo Battaglia, and Marcia K O’Malley. A review of intent detection, arbitration, and communication aspects of shared control for physical human–robot interaction. *Applied Mechanics Reviews*, 70(1), 2018.
- [11] Thomas B Sheridan. Human–robot interaction: status and challenges. *Human factors*, 58(4):525–532, 2016.
- [12] Agostino De Santis, Bruno Siciliano, Alessandro De Luca, and Antonio Bicchi. An atlas of physical human–robot interaction. *Mechanism and Machine Theory*, 43(3):253–270, 2008.
- [13] Panagiota Tsarouchi, Sotiris Makris, and George Chryssolouris. Human–robot interaction review and challenges on task planning and programming. *International Journal of Computer Integrated Manufacturing*, 29(8):916–931, 2016.
- [14] Yue Wen, Minhan Li, Jennie Si, and He Huang. Wearer-prosthesis interaction for symmetrical gait: a study enabled by reinforcement learning prosthesis control. *IEEE transactions on neural systems and rehabilitation engineering*, 28(4):904–913, 2020.
- [15] Minhan Li, Yue Wen, Xiang Gao, Jennie Si, and He Huang. Toward expedited impedance tuning of a robotic prosthesis for personalized gait assistance by reinforcement learning control. *IEEE Transactions on Robotics*, 38(1):407–420, 2022.
- [16] Minhan Li, Xiang Gao, Yue Wen, Jennie Si, and He Helen Huang. Offline policy iteration based reinforcement learning controller for online robotic knee prosthesis parameter tuning. In *2019 International Conference on Robotics and Automation (ICRA)*, pages 2831–2837. IEEE, 2019.
- [17] Ruofan Wu, Minhan Li, Zhikai Yao, Wentao Liu, Jennie Si, and He Huang. Reinforcement learning impedance control of a robotic prosthesis to coordinate with human intact knee motion. *IEEE Robotics and Automation Letters*, 7(3):7014–7020, 2022.
- [18] Kenton R Kaufman, Serena Frittoli, and Carlo A Frigo. Gait asymmetry of transfemoral amputees using mechanical and microprocessor-controlled prosthetic knees. *Clinical Biomechanics*, 27(5):460–465, 2012.
- [19] Timothy P Lillicrap, Jonathan J Hunt, Alexander Pritzel, Nicolas Heess, Tom Erez, Yuval Tassa, David Silver, and Daan Wierstra. Continuous control with deep reinforcement learning. *arXiv preprint arXiv:1509.02971*, 2015.

- [20] John Schulman, Filip Wolski, Prafulla Dhariwal, Alec Radford, and Oleg Klimov. Proximal policy optimization algorithms. *arXiv preprint arXiv:1707.06347*, 2017.
- [21] Tuomas Haarnoja, Aurick Zhou, Kristian Hartikainen, George Tucker, Sehoon Ha, Jie Tan, Vikash Kumar, Henry Zhu, Abhishek Gupta, Pieter Abbeel, et al. Soft actor-critic algorithms and applications. *arXiv preprint arXiv:1812.05905*, 2018.
- [22] Scott Fujimoto, Herke Hoof, and David Meger. Addressing function approximation error in actor-critic methods. In *International Conference on Machine Learning*, pages 1587–1596. PMLR, 2018.
- [23] Xue Bin Peng, Pieter Abbeel, Sergey Levine, and Michiel van de Panne. Deepmimic: Example-guided deep reinforcement learning of physics-based character skills. *ACM Transactions on Graphics (TOG)*, 37(4):1–14, 2018.
- [24] Seungmoon Song, Łukasz Kidziński, Xue Bin Peng, Carmichael Ong, Jennifer Hicks, Sergey Levine, Christopher G Atkeson, and Scott L Delp. Deep reinforcement learning for modeling human locomotion control in neuromechanical simulation. *Journal of neuroengineering and rehabilitation*, 18(1):1–17, 2021.
- [25] Russell Enns and Jennie Si. Apache helicopter stabilization using neural dynamic programming. *Journal of guidance, control, and dynamics*, 25(1):19–25, 2002.
- [26] Russell Enns and Jennie Si. Helicopter trimming and tracking control using direct neural dynamic programming. *IEEE transactions on neural networks*, 14(4):929–939, 2003.
- [27] Russell Enns and Jennie Si. Helicopter flight-control reconfiguration for main rotor actuator failures. *Journal of guidance, control, and dynamics*, 26(4):572–584, 2003.
- [28] Chao Lu, Jennie Si, and Xiaorong Xie. Direct heuristic dynamic programming for damping oscillations in a large power system. *IEEE Transactions on Systems, Man, and Cybernetics, Part B (Cybernetics)*, 38(4):1008–1013, 2008.
- [29] Wentao Guo, Feng Liu, Jennie Si, Dawei He, Ronald Harley, and Shengwei Mei. Approximate dynamic programming based supplementary reactive power control for dfig wind farm to enhance power system stability. *Neurocomputing*, 170:417–427, 2015.
- [30] Jingyi Zhang, Yonghong Luo, Boya Wang, Chao Lu, Jennie Si, and Jie Song. Deep reinforcement learning for load shedding against short-term voltage instability in large power systems. *IEEE Transactions on Neural Networks and Learning Systems*, 2021.
- [31] Marcin Andrychowicz, Filip Wolski, Alex Ray, Jonas Schneider, Rachel Fong, Peter Welinder, Bob McGrew, Josh Tobin, Pieter Abbeel, and Wojciech Zaremba. Hindsight experience replay. *arXiv preprint arXiv:1707.01495*, 2017.
- [32] John Schulman, Sergey Levine, Pieter Abbeel, Michael Jordan, and Philipp Moritz. Trust region policy optimization. In *International conference on machine learning*, pages 1889–1897. PMLR, 2015.
- [33] Qingsong Ai, Zemin Liu, Wei Meng, Quan Liu, and Sheng Q Xie. Machine learning in robot assisted upper limb rehabilitation: A focused review. *IEEE Transactions on Cognitive and Developmental Systems*, 2021.
- [34] Dmitry Kalashnikov, Jacob Varley, Yevgen Chebotar, Benjamin Swanson, Rico Jonschkowski, Chelsea Finn, Sergey Levine, and Karol Hausman. Mt-opt: Continuous multi-task robotic reinforcement learning at scale. *arXiv preprint arXiv:2104.08212*, 2021.
- [35] A Isidori. *Nonlinear Control Systems: An Introduction*. Springer Verlag, Berlin, Germany, 1985.
- [36] Jennie Si and Yu-Tsung Wang. Online learning control by association and reinforcement. *IEEE Transactions on Neural networks*, 12(2):264–276, 2001.

- [37] Yue Wen, Jennie Si, Xiang Gao, Stephanie Huang, and He Helen Huang. A new powered lower limb prosthesis control framework based on adaptive dynamic programming. *IEEE transactions on neural networks and learning systems*, 28(9):2215–2220, 2016.
- [38] Ruofan Wu, Zhikai Yao, Jennie Si, and He Helen Huang. Robotic knee tracking control to mimic the intact human knee profile based on actor-critic reinforcement learning. *IEEE/CAA Journal of Automatica Sinica*, 9(1):19–30, 2021.
- [39] Xiang Gao, Jennie Si, Yue Wen, Minhan Li, and He Helen Huang. Knowledge-guided reinforcement learning control for robotic lower limb prosthesis. In *2020 IEEE International Conference on Robotics and Automation (ICRA)*, pages 754–760. IEEE, 2020.
- [40] Xiang Gao, Jennie Si, Yue Wen, Minhan Li, and He Huang. Reinforcement learning control of robotic knee with human-in-the-loop by flexible policy iteration. *IEEE Transactions on Neural Networks and Learning Systems*, 33(10):5873–5887, 2022.
- [41] Yue Wen, Jennie Si, Andrea Brandt, Xiang Gao, and He Huang. Online reinforcement learning control for the personalization of a robotic knee prosthesis. *IEEE transactions on cybernetics*, 2019.
- [42] Wentao Liu, Junmin Zhong, Ruofan Wu, Bretta L Fylstra, Jennie Si, and He Helen Huang. Inferring human-robot performance objectives during locomotion using inverse reinforcement learning and inverse optimal control. *IEEE Robotics and Automation Letters*, 2022.
- [43] Laetitia Matignon, Guillaume J Laurent, and Nadine Le Fort-Piat. Independent reinforcement learners in cooperative markov games: a survey regarding coordination problems. *The Knowledge Engineering Review*, 27(1):1–31, 2012.
- [44] Ryan Lowe, Yi I Wu, Aviv Tamar, Jean Harb, OpenAI Pieter Abbeel, and Igor Mordatch. Multi-agent actor-critic for mixed cooperative-competitive environments. *Advances in neural information processing systems*, 30, 2017.
- [45] Jakob Foerster, Gregory Farquhar, Triantafyllos Afouras, Nantas Nardelli, and Shimon Whiteson. Counterfactual multi-agent policy gradients. In *Proceedings of the AAAI conference on artificial intelligence*, volume 32, 2018.
- [46] Stefanos Nikolaidis and Julie Shah. Human-robot cross-training: computational formulation, modeling and evaluation of a human team training strategy. In *2013 8th ACM/IEEE International Conference on Human-Robot Interaction (HRI)*, pages 33–40. IEEE, 2013.
- [47] Stefanos Nikolaidis, Yu Xiang Zhu, David Hsu, and Siddhartha Srinivasa. Human-robot mutual adaptation in shared autonomy. In *2017 12th ACM/IEEE International Conference on Human-Robot Interaction (HRI)*, pages 294–302. IEEE, 2017.
- [48] Shervin Javdani, Siddhartha S Srinivasa, and J Andrew Bagnell. Shared autonomy via hindsight optimization. *Robotics science and systems: online proceedings*, 2015, 2015.
- [49] Siddharth Reddy, Anca D Dragan, and Sergey Levine. Shared autonomy via deep reinforcement learning. *arXiv preprint arXiv:1802.01744*, 2018.
- [50] Seyed Farokh Atashzar, Mahya Shahbazi, and Rajni V Patel. Haptics-enabled interactive neurorhabilitation mechatronics: classification, functionality, challenges and ongoing research. *Mechatronics*, 57:1–19, 2019.
- [51] S Farokh Atashzar, Hsien-Yung Huang, Fulvia Del Duca, Etienne Burdet, and Dario Farina. Energetic passivity decoding of human hip joint for physical human-robot interaction. *IEEE Robotics and Automation Letters*, 5(4):5953–5960, 2020.
- [52] Tingfang Yan, Marco Cempini, Calogero Maria Oddo, and Nicola Vitiello. Review of assistive strategies in powered lower-limb orthoses and exoskeletons. *Robotics and Autonomous Systems*, 64:120–136, 2015.

- [53] Shraddha Srivastava, Pei-Chun Kao, Seok Hun Kim, Paul Stegall, Damiano Zanotto, Jill S Higginson, Sunil K Agrawal, and John P Scholz. Assist-as-needed robot-aided gait training improves walking function in individuals following stroke. *IEEE Transactions on Neural Systems and Rehabilitation Engineering*, 23(6):956–963, 2014.
- [54] Andres Martinez, Brian Lawson, Christina Durrough, and Michael Goldfarb. A velocity-field-based controller for assisting leg movement during walking with a bilateral hip and knee lower limb exoskeleton. *IEEE Transactions on Robotics*, 35(2):307–316, 2018.
- [55] Wentao Liu, Ruofan Wu, Jennie Si, and He Huang. A new robotic knee impedance control parameter optimization method facilitated by inverse reinforcement learning. *IEEE Robotics and Automation Letters*, 7(4):10882–10889, 2022.
- [56] Charles T Leonard, RL Craik, and CA Oatis. The neurophysiology of human locomotion. In *Gait Analysis: Theory and Application*. Mosby-Year, 1995.
- [57] Gentaro Taga, Yoko Yamaguchi, and Hiroshi Shimizu. Self-organized control of bipedal locomotion by neural oscillators in unpredictable environment. *Biological cybernetics*, 65(3):147–159, 1991.
- [58] Ryan T Roemmich and Amy J Bastian. Closing the loop: from motor neuroscience to neurorehabilitation. *Annual review of neuroscience*, 41:415–429, 2018.
- [59] Neville Hogan. Impedance control: An approach to manipulation: Part i—theory. 1985.
- [60] Frank Sup, Amit Bohara, and Michael Goldfarb. Design and control of a powered transfemoral prosthesis. *The International journal of robotics research*, 27(2):263–273, 2008.
- [61] Slavka Viteckova, Patrik Kutilek, Zdenek Svoboda, Radim Krupicka, Jan Kauler, and Zoltan Szabo. Gait symmetry measures: A review of current and prospective methods. *Biomedical Signal Processing and Control*, 42:89–100, 2018.
- [62] Antonio Nardone, Marco Godi, Margherita Grasso, Simone Guglielmetti, and Marco Schieppati. Stabilometry is a predictor of gait performance in chronic hemiparetic stroke patients. *Gait & Posture*, 30(1):5–10, 2009.
- [63] Chris Mizelle, Mary Rodgers, and Larry Forrester. Bilateral foot center of pressure measures predict hemiparetic gait velocity. *Gait & Posture*, 24(3):356–363, 2006.
- [64] Yue Wen, Andrea Brandt, Jennie Si, and He Helen Huang. Automatically customizing a powered knee prosthesis with human in the loop using adaptive dynamic programming. In *2017 International Symposium on Wearable Robotics and Rehabilitation (WeRob)*, pages 1–2. IEEE, 2017.
- [65] Scott L Delp, Frank C Anderson, Allison S Arnold, Peter Loan, Ayman Habib, Chand T John, Eran Guendelman, and Darryl G Thelen. Opensim: open-source software to create and analyze dynamic simulations of movement. *IEEE transactions on biomedical engineering*, 54(11):1940–1950, 2007.
- [66] Afshin OroojlooyJadid and Davood Hajinezhad. A review of cooperative multi-agent deep reinforcement learning. *arXiv preprint arXiv:1908.03963*, 2019.
- [67] Kaiqing Zhang, Zhuoran Yang, and Tamer Başar. Multi-agent reinforcement learning: A selective overview of theories and algorithms. *Handbook of Reinforcement Learning and Control*, pages 321–384, 2021.
- [68] Yue Wen, Ming Liu, Jennie Si, and He Helen Huang. Adaptive control of powered transfemoral prostheses based on adaptive dynamic programming. In *2016 38th Annual International Conference of the IEEE Engineering in Medicine and Biology Society (EMBC)*, pages 5071–5074. IEEE, 2016.
- [69] Ruofan Wu, Zhikai Yao, Jennie Si, and He Helen Huang. Robotic knee tracking control to mimic the intact human knee profile based on actor-critic reinforcement learning. *IEEE/CAA Journal of Automatica Sinica*, 9(1):19–30, 2022.

- [70] Minhan Li, Yue Wen, Xiang Gao, Jennie Si, and He Huang. Toward expedited impedance tuning of a robotic prosthesis for personalized gait assistance by reinforcement learning control. *IEEE Transactions on Robotics*, 2021.
- [71] M Jason Highsmith, Casey R Andrews, Claire Millman, Ashley Fuller, Jason T Kahle, Tyler D Klenow, Katherine L Lewis, Rachel C Bradley, and John J Orriola. Gait training interventions for lower extremity amputees: a systematic literature review. *Technology & Innovation*, 18(2-3):99–113, 2016.
- [72] Alberto Esquenazi. Gait analysis in lower-limb amputation and prosthetic rehabilitation. *Physical Medicine and Rehabilitation Clinics*, 25(1):153–167, 2014.
- [73] George NS Marinakis. Interlimb symmetry of traumatic unilateral transtibial amputees wearing two different prosthetic feet in the early rehabilitation stage. *Journal of rehabilitation research and development*, 41(4):581–590, 2004.
- [74] Feng Liu, Jian Sun, Jennie Si, Wentao Guo, and Shengwei Mei. A boundedness result for the direct heuristic dynamic programming. *Neural Networks*, 32:229–235, 2012.
- [75] Yury Sokolov, Robert Kozma, Ludmilla D Werbos, and Paul J Werbos. Complete stability analysis of a heuristic approximate dynamic programming control design. *Automatica*, 59:9–18, 2015.
- [76] Xiang Gao. *Data-Efficient Reinforcement Learning Control of Robotic Lower-Limb Prosthesis With Human in the Loop*. PhD thesis, Arizona State University, 2020.
- [77] Qingtao Zhao, Jennie Si, and Jian Sun. Online reinforcement learning control by direct heuristic dynamic programming: From time-driven to event-driven. *IEEE Transactions on Neural Networks and Learning Systems*, 2021.
- [78] SimTK. Tutorial 1 - intro to musculoskeletal modeling.
- [79] Daniel Jacobs. From the ground up: Building a passive dynamic walker model, 2014.
- [80] Mrn P Kadaba, HK Ramakrishnan, and ME Wootten. Measurement of lower extremity kinematics during level walking. *Journal of orthopaedic research*, 8(3):383–392, 1990.
- [81] Ming Tan. Multi-agent reinforcement learning: Independent vs. cooperative agents. In *Proceedings of the tenth international conference on machine learning*, pages 330–337, 1993.
- [82] Peng Peng, Ying Wen, Yaodong Yang, Quan Yuan, Zhenkun Tang, Haitao Long, and Jun Wang. Multiagent bidirectionally-coordinated nets: Emergence of human-level coordination in learning to play starcraft combat games. *arXiv preprint arXiv:1703.10069*, 2017.
- [83] Jakob Foerster, Nantas Nardelli, Gregory Farquhar, Triantafyllos Afouras, Philip HS Torr, Pushmeet Kohli, and Shimon Whiteson. Stabilising experience replay for deep multi-agent reinforcement learning. In *International conference on machine learning*, pages 1146–1155. PMLR, 2017.
- [84] Juanjuan Zhang, Pieter Fiers, Kirby A Witte, Rachel W Jackson, Katherine L Poggensee, Christopher G Atkeson, and Steven H Collins. Human-in-the-loop optimization of exoskeleton assistance during walking. *Science*, 356(6344):1280–1284, 2017.
- [85] Stefanos Nikolaidis, David Hsu, and Siddhartha Srinivasa. Human-robot mutual adaptation in collaborative tasks: Models and experiments. *The International Journal of Robotics Research*, 36(5-7):618–634, 2017.
- [86] Jonathan Kofman, Xianghai Wu, Timothy J Luu, and Siddharth Verma. Teleoperation of a robot manipulator using a vision-based human-robot interface. *IEEE transactions on industrial electronics*, 52(5):1206–1219, 2005.

## Checklist

The checklist follows the references. Please read the checklist guidelines carefully for information on how to answer these questions. For each question, change the default **[TODO]** to **[Yes]**, **[No]**, or **[N/A]**. You are strongly encouraged to include a **justification to your answer**, either by referencing the appropriate section of your paper or providing a brief inline description. For example:

- Did you include the license to the code and datasets? **[Yes]**
- Did you include the license to the code and datasets? **[Yes]** Simulation details and exact hyperparameters are reported in the supplemental material. Code link: <https://github.com/JennieSi-Lab-RLOC/NeurIPS2022> repository.
- Did you include the license to the code and datasets? **[N/A]**

Please do not modify the questions and only use the provided macros for your answers. Note that the Checklist section does not count towards the page limit. In your paper, please delete this instructions block and only keep the Checklist section heading above along with the questions/answers below.

1. For all authors...
  - (a) Do the main claims made in the abstract and introduction accurately reflect the paper’s contributions and scope? **[Yes]**
  - (b) Did you describe the limitations of your work? **[Yes]**
  - (c) Did you discuss any potential negative societal impacts of your work? **[Yes]**
  - (d) Have you read the ethics review guidelines and ensured that your paper conforms to them? **[Yes]**
2. If you are including theoretical results...
  - (a) Did you state the full set of assumptions of all theoretical results? **[N/A]** We don’t have theoretical analysis
  - (b) Did you include complete proofs of all theoretical results? **[N/A]**
3. If you ran experiments...
  - (a) Did you include the code, data, and instructions needed to reproduce the main experimental results (either in the supplemental material or as a URL)? **[Yes]** Detail instructions in supplemental material
  - (b) Did you specify all the training details (e.g., data splits, hyperparameters, how they were chosen)? **[Yes]**
  - (c) Did you report error bars (e.g., with respect to the random seed after running experiments multiple times)? **[Yes]**
  - (d) Did you include the total amount of compute and the type of resources used (e.g., type of GPUs, internal cluster, or cloud provider)? **[Yes]** In supplement file
4. If you are using existing assets (e.g., code, data, models) or curating/releasing new assets...
  - (a) If your work uses existing assets, did you cite the creators? **[Yes]**
  - (b) Did you mention the license of the assets? **[Yes]**
  - (c) Did you include any new assets either in the supplemental material or as a URL? **[N/A]**
  - (d) Did you discuss whether and how consent was obtained from people whose data you’re using/curating? **[Yes]** In supplement file
  - (e) Did you discuss whether the data you are using/curating contains personally identifiable information or offensive content? **[Yes]** In supplement file
5. If you used crowdsourcing or conducted research with human subjects...
  - (a) Did you include the full text of instructions given to participants and screenshots, if applicable? **[N/A]**
  - (b) Did you describe any potential participant risks, with links to Institutional Review Board (IRB) approvals, if applicable? **[Yes]**
  - (c) Did you include the estimated hourly wage paid to participants and the total amount spent on participant compensation? **[N/A]**

## Appendix A Human-robot walking simulation using OpenSim

### A.1 OpenSim environment

OpenSim is a well-established open source biomechanical modeling tool for conducting biomechanics research and motor control science [65]. In this study, a five rigid-segments bipedal model including a pelvis, two thighs and two shanks is implemented on a rigid level platform to simulate level ground walking, up hill walking, and walking at a different (fast) pace. This simulation platform has been used in reports of previous single-agent based reinforcement learning control of the robotic knee. The simulation validated conceptualization of the solution approaches as well as the resulted controller structures have consequently been adopted in and adapted to human experiments.

The pelvis segment is linked to the ground platform using a slider joint, which allows the body to move relative to the ground. The thigh segments are linked to the pelvis using one-degree-of-freedom pin joints (hip joints). A pre-prescribed motion according to a well-established, normative data set [78] is applied to the hip joints. The shank segments are attached to the thighs using one-degree-of-freedom pin joints (knee) as well. Two torque actuators are applied to the knee joints for both sides so that the knee motion can be controlled by the torque. How torque control takes place via impedance controller and how impedance value updates are described in in appendix A.6. At the end of the shank segments, a contact sphere is set to simulate the ground reaction force between the foot and the ground using Hunt and Crossley contact force model. The range of hip joints is limited between  $[-100, 100]$  degrees while the knee joint is limited in  $[-140, 0]$  degrees to avoid over extension of the knee. Additional model settings, such as segment length, body mass and inertial parameters, are according to the lower limb OpenSim model in [79]. The left limb is designated as human controlled while the right limb as robot learning controlled [78]. Both knees are set to 0 degree at initialization and the initial angular velocities are  $-3.58$  degree/s (right) and  $-3.32$  degree/s (left), respectively.

In experimental evaluations, to simulate up hill walking, the ground is set as a  $11.5$  degree inclined ramp. To simulate walking at a different pace, the pre-prescribed hip motion is adjusted to allow a speed up to  $112\%$ . The rest of the settings are the same as the level walking task described above.

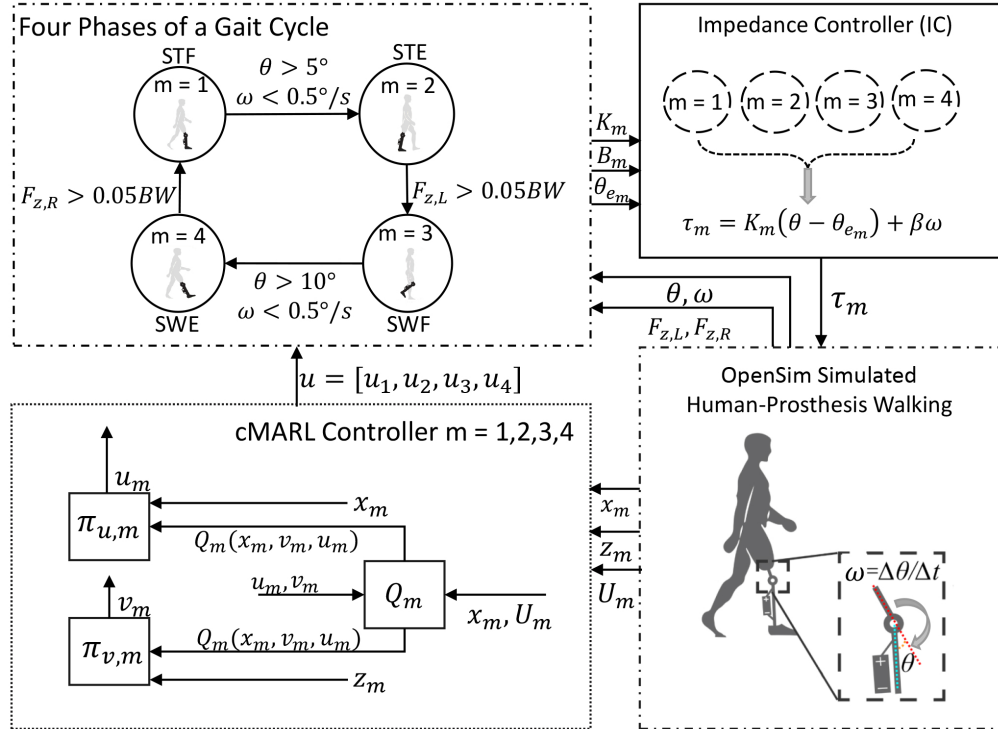

Figure 6: The OpenSim simulation platform of human-prosthesis walking with cMARL control.

## A.2 From real human experiment data to extract sensor noise and use them in simulations

To simulate state variables as if they were measured from experiments, we add noise to the simulated states. The sensor noise profiles were generated based on gait-to-gait variances of human-robot walking data captured from able-bodied subjects walking with prosthesis during stable and continuous walking of a single-agent based study. All experiments were approved by the Institutional Review Board. A total of 120 gait cycles of the knee joint movement trajectories were recorded in a level ground test during which the subject was required to walk wearing a prosthesis with a fixed impedance parameter after tuning. A goniometer was attached to measure the intact side knee motion. The prosthesis knee motion was directly read from the built-in sensors. The feature points (peak angle  $P^p$ ,  $P^i$  and phase duration  $D^p$ ,  $D^i$ ) of each gait cycle as shown in Figure 1 were collected. The standard deviations of intact and prosthetic knee feature points ( $P^p$ ,  $P^i$ ,  $D^p$ ,  $D^i$ ) were computed. The actuator noise was set at the same level as that of hardware instrumentation precision level which is 1% of the respective normative values of the impedance parameters.

The sensor and actuator noise are added as a white Gaussian noise with the standard deviation obtained from the above procedures. The standard deviations are 0.64 degree and 0.29 degree for  $P^i$  and  $P^p$ , respectively. For  $D^i$  and  $D^p$ , the standard deviations are 0.5% and 0.24%, respectively. The sensor noise is added to the state  $x_k$  at each simulated step and the actuator noise is added to the action  $v_k$  and  $u_k$  at the output of the respective actor networks. The white noise added in each phase follows the same noise profile (i.e., the same Gaussian white noise) because the hardware does not change among phases.

## A.3 Finite State Impedance Control (FS-IC)

The FS-IC is the most employed intrinsic control framework for wearable lower limb prosthesis. Impedance control, also known as “compliance control”, is well-established as a safe and reliable control strategy for lower limb prosthesis [59]. It allows a human to interact with a robot, rather than a position control that forces the amputee to react to the prosthesis. Almost all commercially available computer-controlled prostheses incorporate impedance control. In this study, impedance control of prosthesis joints mimics how humans control their biological joints in legs in walking. The finite state machine is used to mimic periodic gait cycles where each gait cycle is partitioned into four phases. For each phase, the prosthetic system mimics a passive spring-damper-system with predefined impedance [4, 5, 6] (i.e. stiffness  $K$ , damping coefficient  $B$ , and equilibrium position  $\theta_e$ ) that matched the biological knee impedance.

Refer to Figure 6, a gait cycle is divided into four phases in the FS-IC: stance flexion (STF,  $m = 1$ ), stance extension (STE,  $m = 2$ ), swing flexion (SWF,  $m = 3$ ) and swing extension (SWE,  $m = 4$ ). The phase transitions are determined by knee motion and gait events (heel strike and toe-off) [7, 8] that are obtained from vertical ground reaction forces of both legs. According to Figure 6, the transition from STF to STE is made when the knee angular velocity  $\omega$  is less than 0.5 degree per second and the knee angle  $\theta$  greater than 5 degree. Similar condition is set for the transition from SWF to SWE as the angle threshold is set to 10 degrees. On the other hand, the transition between stance and swing is made according to the ground reaction force. Specifically, the transition from SWE to STF is triggered when the ground reaction force  $F_{z,L}$  greater than a small threshold, 0.05 (5%) of Body Weight (BW), which is set to avoid false detection caused by noise. And the transition from STE to SWF is triggered when the contralateral limb hits the ground ( $F_{z,R} > 0.05BW$ ).

For each of the four FS-IC phases  $m$ , there is a cMARL controller (Figure 6) to generate the respective control  $u_m$  which is the adjustment to the current impedance values  $I_m$  ([stiffness  $K$ , damping  $B$ , and equilibrium position  $\theta_e$ ]). Therefore, 12 impedance parameters, 3 for each of the 4 phases, ( $I = [I_1, I_2, I_3, I_4]$ ), are needed to simulate a gait in OpenSim where the prosthetic knee (right) is controlled by FS-IC with impedance setting  $I$ .

## A.4 Safety and reliability

In our real-world setting, safety and reliability for an integrated human-robot system are our consideration and Three safety features were implemented in the experiment to prevent "un-natural" control.

First and foremost, RL control is built on top of the finite state machine (FSM) impedance control, also known as “compliance control” (refer to Appendix A.3), which allows human to interact with robot, unlike position control that forces amputee to react to the prosthesis [60].

Next, safety bounds on knee angle and phase duration, step length and stance time are placed within FSM [40]. If a potential fall is detected, the RL controller is reset to the initial stabilizing controller. Specifically, as shown in Table 2, the safety bound is set at 1.5 times the standard deviations of the respective knee kinematic peak values observed in each phase [80]. If a state exceeds the safety bound, which means the prosthetic knee may place subjects into an unsafe situation, the impedance parameters of the prosthetic knee will be reset back to the initialized impedance values, but the actor and critic network weights are kept and will carry on with further training.

Lastly, actions generated from RL are bounded, a consideration which also reflects realistic constraints on actuation to limit control gain and avoid significant jump in impedance parameters.

Table 2: Safety bounds and tolerance bounds

|                                                                                                                          | Phase 1                                                | Phase 2                                                | Phase 3                                                | Phase 4                                                |
|--------------------------------------------------------------------------------------------------------------------------|--------------------------------------------------------|--------------------------------------------------------|--------------------------------------------------------|--------------------------------------------------------|
| <b>Safety Bounds</b>                                                                                                     |                                                        |                                                        |                                                        |                                                        |
| $\begin{bmatrix} \text{Angle}(\circ) & \text{Duration}(\%) \\ \text{StepLength}(m) & \text{StanceTime}(s) \end{bmatrix}$ | $\begin{bmatrix} 10.5 & 12 \\ 0.2 & 0.2 \end{bmatrix}$ | $\begin{bmatrix} 7.2 & 12 \\ 0.2 & 0.2 \end{bmatrix}$  | $\begin{bmatrix} 9 & 12 \\ 0.2 & 0.2 \end{bmatrix}$    | $\begin{bmatrix} 6 & 12 \\ 0.2 & 0.2 \end{bmatrix}$    |
| <b>Tolerance Bounds</b>                                                                                                  |                                                        |                                                        |                                                        |                                                        |
| $\begin{bmatrix} \text{Angle}(\circ) & \text{Duration}(\%) \\ \text{StepLength}(m) & \text{StanceTime}(s) \end{bmatrix}$ | $\begin{bmatrix} 1.5 & 2 \\ 0.02 & 0.02 \end{bmatrix}$ | $\begin{bmatrix} 1.5 & 2 \\ 0.02 & 0.02 \end{bmatrix}$ | $\begin{bmatrix} 1.5 & 2 \\ 0.02 & 0.02 \end{bmatrix}$ | $\begin{bmatrix} 1.5 & 2 \\ 0.02 & 0.02 \end{bmatrix}$ |

#### A.5 Setting up human control prior to simulating human-robot as collaborating agents

To simulate an intact limb controlled by a human during walking, we design an impedance controller so that the simulated human-robot walks at a designated step length of  $\lambda_0$  as in Eq. 6. This procedure is performed prior to cMARL control design implemented in OpenSim.

Both left and right knee controls are enabled by FS-IC in OpenSim. The right knee (prosthesis) is controlled by a fixed set of impedance parameters that correspond to a normative gait profile. This set of impedance parameters does not go through learning. The left knee (intact) control goes through learning and adaptation. A single agent reinforcement learning controller (without human involvement) is implemented. The state variable  $s$  is defined as the difference between the actual step length and the desired step length, i.e.,  $s = \lambda^i - \lambda_0$ . The action is still the same as in Eq. 5, i.e.,  $u = [\Delta K, \Delta B, (\Delta \theta_e)]^T$ . The stage cost is defined as  $U = sR_s s + u_s R_u u_s$ , where  $R_s = 1$  and  $R_u = \text{diag}(0.01, 0.01, 0.01)$ . The tolerance bound for state variable  $s$  is  $\pm 0.015$  from the desired step length  $\lambda_0 = 0.75$ .

Three training trials, each with 300 steps, with different random seeds are used to sequentially update the intact knee control. Namely, the impedance parameters are kept from one trial transitioning into the next but the network weights are randomly initialized to enable exploration. This procedure has resulted in a reliable human controlled knee. With this controller, the simulated human walking is then enabled by this set of impedance parameters, which results in a step length of 0.75. This set of impedance control parameters remain unchanged to carry out the study.

#### A.6 Integrating cMARL controller into FS-IC and OpenSim simulation of walking

Figure 6 is the overall structure based on which we have performed the evaluations. First of all, the bipedal model OpenSim environment is initialized according to Appendix A.1. Secondly, the knee joint torque actuator is enabled by an FS-IC controller which parses a gait cycle into 4 phases according to Appendix A.3. A random but stabilizing initial set of impedance parameters is given to the FS-IC to enable walking. Then, a cMARL controller is initialized for each of four phases.

Once initialized, OpenSim simulation proceeds by passing the state  $x_m$  and stage cost  $U_m$  the cMARL, which triggers learning as shown in Algorithm in Appendix D. The control actions  $u_m$  for each of the four phases, with the same form as in Eq. 5 but from respectively different cMARL controllers, are placed into the FS-IC. Then FS-IC will update the impedance parameters by Eq. 2 and provide continuous torques based on Eq. 1 to the knee actuator. Finally, OpenSim simulated

gait provides the state  $x_m$  and stage cost  $U_m$  to cMARL. The above procedure repeats until cMARL learning terminates by reaching into the state  $x_m$  the tolerance bound in Table 1.

## Appendix B Additional Results

### B.1 Batch vs. online implementation

In most of deep reinforcement learning applications such as humanoid in MuJoCo and many others, researchers usually train reinforcement learning modules in millions of steps and with memory size at a million level as well. Batch training with batch size of hundreds or thousands have been very effective, efficient and successful. However, in real world application like our human-robot cMARL problem, it is unrealistic to ask an amputee subject to walk millions of steps wearing a prosthesis. We therefore need to perform training in several gait cycles at the level of hundreds. As such, using batch training in our control framework, especially with in FS-IC, may not result in anticipated outcome as in deep neural network training. We therefore performed all experiments in this study using online learning. However, we have also performed an evaluation of training using batch vs. online modes. Figure (7) shows training performance of an implementation using a batch size of 3 and an online implementation. Comparisons are under the same comparable conditions including initial conditions. Results are based on 6 consecutive trails, each having 300 steps. Online learning converges faster than batch learning most likely due to that the network weights are updated more frequently.

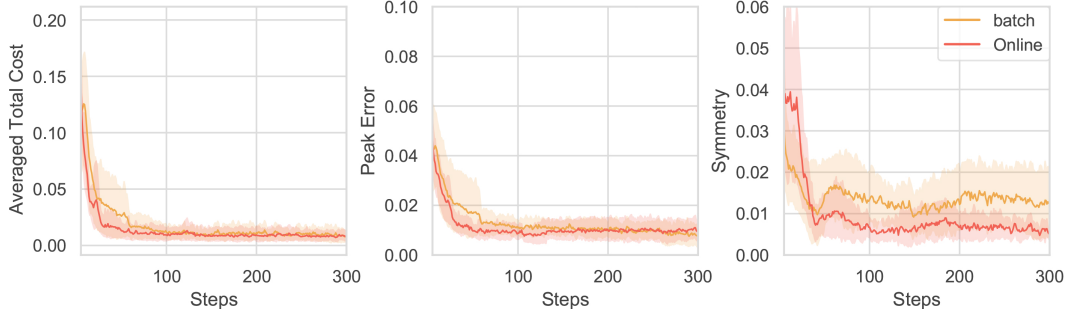

Figure 7: A comparison of online vs batch (batch size 3) training

### B.2 About estimated human control

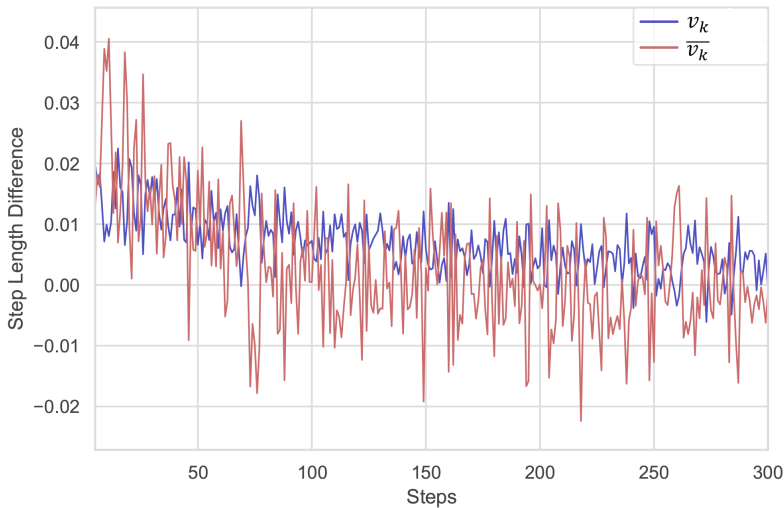

Figure 8: A comparison between the estimated human control  $v_k$  and the actual human control  $\bar{v}_k$  during evaluation.

We make use of an estimated human control  $v_k$  in the design of robot control, all under a cMARL problem construct of shared control objective between a human and a robot. It is therefore important to know if the estimated human control  $v_k$  is able to capture human action. Figure 8 shows that the estimated human action  $v_k$  and the actual measured action  $\bar{v}_k$  of an evaluation trial, based on a fully trained policy. It indicates that the estimated human action  $v_k$  learns to approach actual human action  $\bar{v}_k$ . Moreover,  $v_k$  fluctuates less than the actual, a phenomenon which suggests that  $v_k$  may have become an inference bias of the human through learning to provide foresight on the ultimate goal, i.e. to optimize the shared objective function of cMARL by human and robot.

### B.3 Converged impedance parameters

| task  | STF  |      |            | STE  |      |            | SWF   |        |            | SWE   |        |            |
|-------|------|------|------------|------|------|------------|-------|--------|------------|-------|--------|------------|
|       | $K$  | $B$  | $\theta_e$ | $K$  | $B$  | $\theta_e$ | $K$   | $B$    | $\theta_e$ | $K$   | $B$    | $\theta_e$ |
| level | 2.09 | 0.10 | -0.27      | 0.21 | 0.12 | -0.02      | 0.042 | 0.0055 | -1.03      | 0.055 | 0.0054 | -0.24      |
| level | 2.00 | 0.09 | -0.31      | 0.18 | 0.11 | -0.03      | 0.053 | 0.0059 | -1.05      | 0.060 | 0.0058 | -0.26      |
| level | 2.12 | 0.12 | -0.27      | 0.17 | 0.09 | -0.22      | 0.034 | 0.0049 | -1.02      | 0.056 | 0.0061 | -0.21      |
| level | 2.40 | 0.12 | -0.31      | 0.22 | 0.14 | -0.05      | 0.086 | 0.0084 | -0.90      | 0.074 | 0.0076 | -0.21      |
| level | 1.77 | 0.10 | -0.29      | 0.21 | 0.11 | -0.03      | 0.037 | 0.0043 | -1.00      | 0.047 | 0.0052 | -0.26      |
| slope | 1.48 | 0.12 | -0.26      | 0.16 | 0.10 | -0.13      | 0.042 | 0.0069 | -1.02      | 0.046 | 0.0048 | -0.26      |
| slope | 1.79 | 0.24 | -0.28      | 0.24 | 0.21 | 0.11       | 0.049 | 0.0072 | -1.10      | 0.048 | 0.0071 | -0.06      |
| slope | 2.48 | 0.13 | -0.29      | 0.19 | 0.09 | -0.09      | 0.044 | 0.0059 | -1.04      | 0.036 | 0.0045 | -0.24      |
| slope | 2.08 | 0.10 | -0.30      | 0.23 | 0.07 | -0.23      | 0.041 | 0.0066 | -1.03      | 0.044 | 0.0047 | -0.28      |
| slope | 1.97 | 0.10 | -0.21      | 0.19 | 0.02 | -0.04      | 0.088 | 0.0067 | -0.84      | 0.146 | 0.0210 | -0.03      |
| Pace  | 2.04 | 0.10 | -0.32      | 0.18 | 0.11 | -0.06      | 0.013 | 0.0039 | -1.07      | 0.055 | 0.0051 | -0.30      |
| Pace  | 2.44 | 0.10 | -0.31      | 0.17 | 0.10 | -0.14      | 0.033 | 0.0036 | -0.75      | 0.046 | 0.0057 | -0.27      |
| Pace  | 2.18 | 0.13 | -0.33      | 0.17 | 0.08 | -0.05      | 0.044 | 0.0067 | -1.06      | 0.056 | 0.0058 | -0.26      |
| Pace  | 1.49 | 0.13 | -0.36      | 0.15 | 0.09 | -0.09      | 0.044 | 0.0062 | -1.12      | 0.037 | 0.0049 | -0.21      |
| Pace  | 2.15 | 0.10 | -0.29      | 0.15 | 0.07 | -0.20      | 0.032 | 0.0051 | -1.04      | 0.045 | 0.0060 | -0.19      |

Table 3: This table shows the final converged impedance parameters for all 4 phases from three different tasks described in 5

Table 3 summarizes all 12 impedance control parameters. Note however, such comparison may not yield much insight due to redundancy in human joint actuation space, and also strong coupling among parameters. On a side note, the current state-of-the-art practice in clinics is to manually tune 1 impedance at a time, a practice that cannot take into account of coupling, nor it is possible to tune all 12 parameters simultaneously best achieving a tuning goal.

## Appendix C Simulated human environment

### C.1 Setting up Matlab scripting environment

Although OpenSim has a dedicated GUI interface, in this study we are using the OpenSim API to implement the environment in Matlab. Please follow the instructions provided by SimTK with the link below :<https://simtk-confluence.stanford.edu:8443/display/OpenSim/Scripting+with+Matlab>

Here are the key steps of configuration

1. Launch MATLAB in administrator mode.
2. Run the configureOpenSim.m under OpenSim/script directory
3. Choose the installation path of OpenSim in the dialog
4. Restart Matlab
5. Load OpenSim library by command: Import org.opensim.modeling.\*

### C.2 Bipedal walking model building

The walking model was based on a bipedal model provided by SimTK. The model consists of a rigid platform and a four-link walker. The platform is connected to the ground by a pin joint that permits rotation about the Z-axis. The pelvis of the walker is connected to the platform by a FreeJoint object, which allows 6-degree-of-freedom (i.e., unconstrained) motion between the pelvis and the platform. PinJoint objects are used to connect the thighs to the pelvis and the shanks to the thighs. Two torque actuators are applied to the knee joints for both sides so that the knee motion can be controlled by the torque. At the end of the shank segments, a contact sphere is set to simulate the ground reaction force between the foot and the ground using Hunt and Crossley contact force model. The range of

hip joints is limited between  $[-100,100]$  degrees while the knee joint is limited in  $[-140,0]$  degrees to avoid over extension of the knee. Additional model settings, such as segment length, body mass and inertial parameters, can be configured through the .osim model configuration file in a xml format.

In this study, the left limb is designated as human controlled while the right limb as robot learning controlled. The torque actuator was added under tag `<forceSet>/<objects>/< TorqueActuator>`.

The original osim file can be downloaded from the link below.

<https://simtk-confluence.stanford.edu:8443/display/OpenSim33/>

From+the+Ground+Up+%3A+Building+a+Passive+Dynamic+Walker+Model

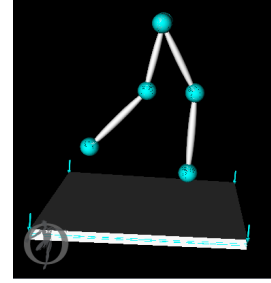

Figure 9: OpenSim human model

### C.3 Scripting OpenSim with Matlab

During the implementation, the following scripts was implemented as described below. The example file can be downloaded from the link: <https://simtk-confluence.stanford.edu:8443/pages/viewpage.action?pageId=28777060>

We customized some scripts to realize the desired function. We attached the modified code at the end of the appendix to help replicate the simulation environment. Table C.3 shows the scripts' name and their description to help reader understand their functionalities.

| Script Name                    | Description                                                                                                                                                                                                                                                                                                                                                                                                                                                                         |
|--------------------------------|-------------------------------------------------------------------------------------------------------------------------------------------------------------------------------------------------------------------------------------------------------------------------------------------------------------------------------------------------------------------------------------------------------------------------------------------------------------------------------------|
| IntegrateOpenSimPlant.m        | This function runs (and optionally visualizes) a forward simulation using one of Matlab's integrators. The script creates a plant function which returns state derivatives given a model and state values. This plant function can then be passed to any of the built-in integration tools in Matlab. The function IntegrateOpenSimPlant allows you to quickly run a simulation from the default values of the model in a single line. This function requires OpenSimPlantFunction. |
| OpenSimPlantControlsFunction.m | The function calculates a set of control values which are input to OpenSim muscles and actuators.                                                                                                                                                                                                                                                                                                                                                                                   |
| OpenSimPlantFunction.m         | This function creates an interface which calculates the state derivatives for an OpenSim Model object and a OpenSim State object. This function can be passed to a Matlab integrator such as ode15s.                                                                                                                                                                                                                                                                                |

### C.4 Structure of simulation environment

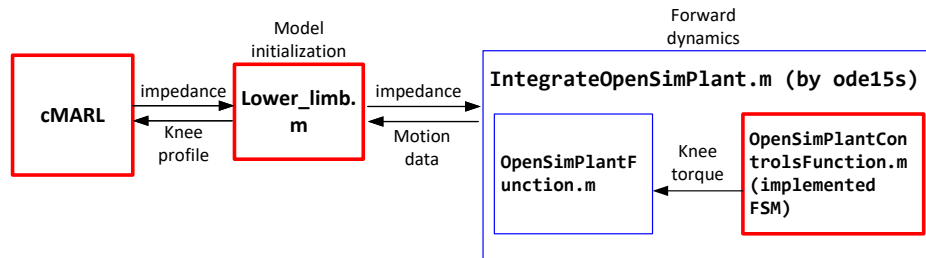

Figure 10: The OpenSim simulation platform of human-prosthesis walking with cMARL control.

Figure 10 shows the code structure of the simulation. The customized script will displayed in red box while the API script was in blue box. Lower\_limb.m is the interface between Agent and the OpenSim. Agent feeds the updated impedance parameters through lower\_limb and obtained the

knee profile as feedback. Lower\_limb.m will call the OpenSim API by a ODE solver (ode15s) to compute the forward dynamics of the human locomotion. The communication rate between Agent and Lower\_limb is once per gait cycle. And the communication rate between lower\_limb and OpenSim is decided by ode15s solver. In the OpenSim, OpenSimPlantFunction.m will execute the customized function OpenSimPlantControlsFunction.m which contains the FSM-IC controller. All the customized codes were shared at the end of the Appendix.

## Appendix D Baseline and ablation study implementation

In this study we compare cMARL with DDPG, COMA and cMARL without human agent (dHDP).

The code of DDPG and COMA was modified based on the public code to fit into our environment. By loading the corresponding class of algorithm in the main.m line 14, user can choose the different formation of cost and learning rule. Or customized by themselves. The example code of the controller will be released (with a URL to the github repository) along with the camera-ready version.

For MADDPG, we allow human and robot have different stage cost as  $U_v = z^T R_z z + R_v v^2 + \mu h^2$  and  $U_u = (x^-)^T (R_{x^-}) x^- + u^T R_u u$ , respectively where  $x^-$  only includes the robotic joint kinematic variables. These stage costs respectively go to update critic  $Q_v$  and  $Q_u$ .  $Q_v = \sum_{j=k}^{\infty} \gamma^{j-k} U_v$  and  $Q_u = \sum_{j=k}^{\infty} \gamma^{j-k} U_u$  for human and robot. Human policy ( $\pi_v$ ) (function of  $z$ ) and robot policy ( $\pi_u$ ) (function of  $x^-$ ) are determined accordingly. using  $Q_v$  and  $Q_u$  functions, respectively. Respective policies will execute based on their local observation  $z$  and  $x^-$ . For COMA, we train a single centralized critic  $Q = \sum_{j=k}^{\infty} \gamma^{j-k} U$  with joint stage cost  $U = U_v + U_u$  where  $U_v, U_u$  are the same as in MADDPG. Policies will execute locally. We update the policies using respective TD errors in place of a non-biased advantage function [45] because we are dealing with a strongly coupled human-robot system. Therefore it does not make sense to implement the counterfactual advantage function as in COMA. Also note that, we use real-time training instead of batch memory because collecting batch data for policy update requires an amputee subject to endure multiple gait cycles before one learning update. This may not be realistic for practical use. Nonetheless, an evaluation is performed (Appendix B.1). Details on the derivations and implementations of the tailored MADDPG and COMA are in Appendix D.

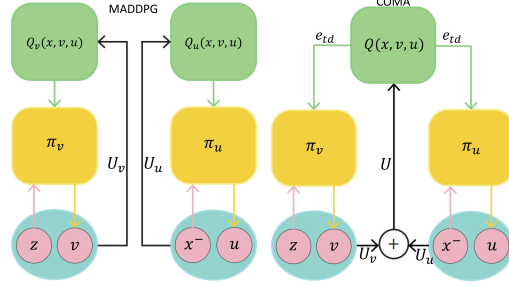

Figure 11: MADDPG (left) and COMA (right) tailored to solve the human-robot symmetrical walking problem.

### D.1 cMARL without human agent

In the ablation study, we remove the human agent to study how effective of the human agent in the learning process. This turns the problem into a single agent approach (dHDP) [36].

**Learning Algorithm.** We consider the stage cost as

$$U(x_k, u_k) = x_k^T R_x x_k + u_k^T R_u u_k, \quad (18)$$

where  $R_x \in \mathbb{R}^{4 \times 4}$  and  $R_u \in \mathbb{R}^{3 \times 3}$  are positive semi-definite weighting matrices.

Solving optimal control policies  $\pi_v^*$  and  $\pi_u^*$  requires solving the optimal  $Q$  function that satisfies Bellman optimality equation:

$$Q^*(x_k, u_k) = U(x_k, u_k) + \gamma Q^*(x_{k+1}, \pi_u^*(x_{k+1})). \quad (19)$$

When using a neural network-based actor-critic solution framework, we approximately solve the optimal control problem using the following iterative procedure ( $i$  is the iteration index),

$$Q_{i+1}(x_k, u_k) = U(x_k, u_k) + \gamma Q_i(x_{k+1}, \pi_{u_i}(x_{k+1})), \quad (20)$$

where  $\pi_{u_i}(x_k) = \arg \min_{u_k} Q_i(x_k, v_k, u_k)$ ,

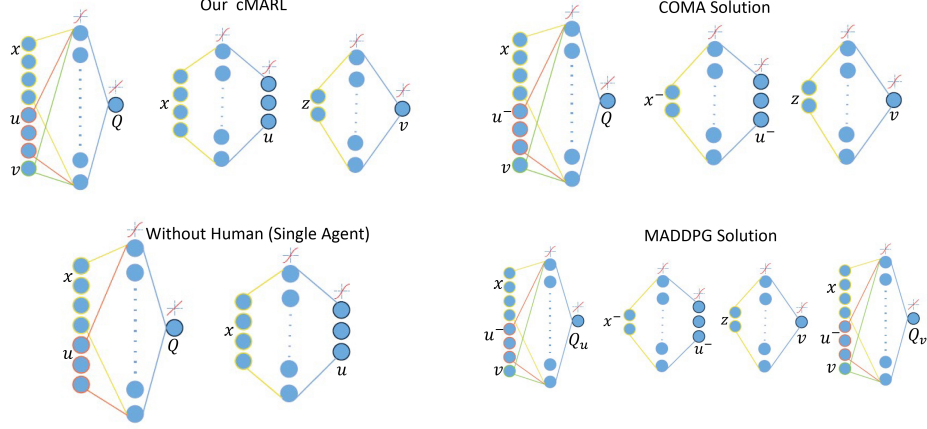

Figure 12: Actor-critic networks for benchmark evaluation and ablation evaluation. Clockwise: our proposed cMARL, COMA solution, MADDPG solution, and our approach without considering human or single-agent approach in the ablation study.

and  $Q_i(x_k, u_k)$  are iterative actor policies and iterative  $Q$  value function.

During training, the actor and critic back-propagate their respective squared error to update their weights. The prediction error of actor  $e_{a_u,k} \in \mathbb{R}$  is,

$$e_{a_u,k} = \frac{1}{2}(Q_i(x_k, u_k))^2. \quad (21)$$

The prediction error for the critic  $e_{c,k}$  is formulated based on the Bellman error,

$$\epsilon_{c,k} = U + \gamma Q_i(x_{k+1}, \pi_{u_i}(x_{k+1})) - Q_{i+1}(x_k, u_k), \quad (22)$$

and the critic neural network is trained to minimize  $e_{c,k} = \frac{1}{2}\epsilon_{c,k}^2$ .

**Network architecture.** For the ablation study, a single agent based on dHDP with one critic network and one actor network was implemented. To represent our neural shape, we use a 3-layer MLP with 6 hidden units for all networks. The critic network uses linear activation function in the output layer while the actor network uses hyperbolic function to bound the action output. The network was optimized by our own optimizer that based on stochastic gradient descent with back-propagation.

**Training parameters.** Since training speed is critical in a real human experiment, when optimizing the single agent, a learning rate of  $\eta = 1 \times 10^{-2}$  was used to train both critic and actor network. The optimization target error was  $\epsilon = 1 \times 10^{-3}$ . The discount factor  $\gamma = 0.95$  was used for all scenarios and ablation study. We initialize the network weights uniformly in the range  $[-1, 1]$ . we set the weighting matrices in the stage cost Eq. 1 to be:  $R_x = \text{diag}(1, 1, 0.25, 0.25)$ ,  $R_u = \text{diag}(0.1, 0.1, 0.1)$ , and  $R_v = 0.1$ .

The convergence of criteria was set as 1.5 degree for knee angle error and 2% for duration error which was decided by the device sensor accuracy in the real life and normal human noise. The observation and action noise were added to the simulation experiment. The detail of the human noise is mentioned in Appendix A.2.

Each training trail contains 300 gait cycles. Evaluations are conducted every 2 gaits during the first 50 gaits and then every 10 gaits afterwards, each using the latest policy at the time of evaluation.

## D.2 cMARL

Our cMARL method has been reported in the paper with its actor-critic network prediction errors described in Eqs. 10 and 11. During training, the actor and critic networks back-propagate their respective squared errors to update their weights.

**Learning Algorithm.** We consider the stage cost to be shared between the human and the robot.

$$U(x_k, v_k, u_k) = x_k^T R_x x_k + R_v v_k^2 + u_k^T R_u u_k + \mu h_k^2, \quad (23)$$

where  $R_x \in \mathbb{R}^{4 \times 4}$  and  $R_u \in \mathbb{R}^{3 \times 3}$  are positive semi-definite weighting matrices,  $R_v$  and  $\mu$  are positive weighting constants, and  $h_k = v_k - \bar{v}_k$ . In the above, the difference between actual human step length  $\lambda_k^i$  and reference  $\lambda_o$ , denoted as  $\bar{v}_k = \lambda_k^i - \lambda_o$ , is considered practical and available.

Solving optimal control policies  $\pi_v^*$  and  $\pi_u^*$  requires solving the optimal  $Q$  function that satisfies Bellman optimality equation:

$$Q^*(x_k, v_k, u_k) = U(x_k, v_k, u_k) + \gamma Q^*(x_{k+1}, \pi_v^*(z_{k+1}), \pi_u^*(x_{k+1})). \quad (24)$$

When using a neural network-based actor-critic solution framework, we approximately solve the optimal control problem using the following iterative procedure ( $i$  is the iteration index),

$$Q_{i+1}(x_k, v_k, u_k) = U(x_k, v_k, u_k) + \gamma Q_i(x_{k+1}, \pi_{v_i}(z_{k+1}), \pi_{u_i}(x_{k+1})), \quad (25)$$

where  $\pi_{v_i}(z_k) = \arg \min_{v_k} Q_i(x_k, v_k, u_k)$ ,  $\pi_{u_i}(x_k) = \arg \min_{u_k} Q_i(x_k, v_k, u_k)$ , and  $Q_i(x_k, v_k, u_k)$  are iterative actor policies and iterative  $Q$  value function.

During training, the actor and critic back-propagate their respective squared error to update their weights. The prediction error of actor  $e_{a_v,k}, e_{a_u,k} \in \mathbb{R}$  is,

$$e_{a_v,k} = e_{a_u,k} = \frac{1}{2} (Q_i(x_k, v_k, u_k))^2. \quad (26)$$

The prediction error for the critic  $e_{c,k}$  is formulated based on the Bellman error,

$$\epsilon_{c,k} = U + \gamma Q_i(x_{k+1}, \pi_{v_i}(z_{k+1}), \pi_{u_i}(x_{k+1})) - Q_{i+1}(x_k, v_k, u_k), \quad (27)$$

and the critic neural network is trained to minimize  $e_{c,k} = \frac{1}{2} \epsilon_{c,k}^2$ .

**Network architecture.** As figure shows, cMARL contains one critic network and two actor networks. Same as single agent, we use a 3-layer MLP with 6 hidden units for all networks. The actor-critic code was built upon dHDP code. The critic network uses linear activation function in the output layer while the actor network uses hyperbolic function to bound the action output. The stage cost was defined in Eq. 6. The corresponding error functions were defined in Eq.9 and Eq.10.

**Training parameters.** Due to the training speed is critical in the real human experiment, when optimizing the cMAR, a learning rate of  $\eta = 1 \times 10^{-2}$  was used to train both critic and actor network. The optimization target error was  $\epsilon = 1 \times 10^{-3}$ . The discounted factor  $\gamma = 0.95$ . The convergence criteria are same as single agent dHDP.

### D.3 COMA

COMA is popular MARL algorithm which utilizes a single centralized critic by using global state information and actions of all agents. Additionally, COMA addresses the multi-agent credit assignment challenge by using a counterfactual baseline which keeps all other agents' actions fixed while treating a single marginalized agent. In game-playing problems, COMA significantly improves performance over other MARL methods such as independent Q-learning [81], multiagent bidirectionally-coordinated nets [82], and variant DQN [83]. However, due to the heavy dynamic coupling between the human and prosthesis, it is impossible to keep one agent action fixed and marginalize out the other agent's action. As a result, this counterfactual baseline is not appropriate for our problem, either. Our Matlab version of COMA is based on [45] and weights updates using our own optimizer on E.6

**Learning Algorithm.** The original COMA uses a single centralized critic based on global states and actions. Additionally, COMA addresses the challenge of multi-agent credit assignment problem by using a counterfactual baseline that marginalises out a single agent's action while keeping other agents' actions fixed. However, in our cMARL human-robot symmetrical walking problem, human and prosthesis are tightly coupled both in time and space. It is impossible to break apart the two agents, i.e., it is not suitable for an implementation using counterfactual function. Therefore, we keep the single centralized critic but instead of using counterfactual advantage function, we use a TD error as a non-biased advantage function while each agent acts locally. The stage cost is represented by

$$U = U_v + U_u, \quad (28)$$

where  $U_v$  and  $U_u$  have the same structure as those in the above MADDPG solution. Additionally, our COMA implementation executes locally based on local observations. The centralized critic prediction error is

$$\epsilon_{c,k} = U + \gamma Q_i(x_{k+1}, \pi_{v_i}(z_{k+1}), \pi_{u_i}(x_{k+1}^-)) - Q_{i+1}(x_k, v_k, u_k^-), \quad (29)$$

and the critic neural network is trained to minimize  $e_{c,k} = \frac{1}{2}\epsilon_{c,k}^2$ . Additionally, the prediction error of actor for human  $e_{a_v,k}$  and prostheses  $e_{a_u,k}$  shared the TD error with the critic,

$$e_{a_v,k} = e_{a_u,k} = e_{c,k}, \quad (30)$$

where during training, the actor and critic back-propagate their respective squared error to update their weights.

**Network architecture.** As figure 12 shows, COMA shared the same architecture from cMARL. Our code is modified upon the public COMA code to fit in our environment. To fair comparison, the shape of network which are 3-layer MLP. The stage cost was defined in Eq. 11. The corresponding error functions were defined in Eq. 12 and 13.

**Training parameters.** To fair comparison, COMA use the same hyperparameter as cMARL which the learning rate of  $\eta = 1 \times 10^{-2}$  was used to train both critic and actor network. The optimization target error was  $\epsilon = 1 \times 10^{-3}$ . The discounted factor  $\gamma = 0.95$ . The convergence criteria are same as cMARL.

#### D.4 MDDPG

MADDOPG is another popular CTDE-based method to solve both cooperative and competitive MARL problems. Agents are assumed to communicate complete and perfect information with each other, so a centralized critic is trained from global state/action data, allowing agents to have individual reward functions. However, since it is unrealistic for the human to have direct access to robot kinematic sensor data, this structure is not immediately appropriate for the human-robot collaborative walking problem. Our Matlab version of MDDPG is based on [44] and weights updates using our own optimizer on E.6

**Learning Algorithm.** The MDDPG was proposed to solve both cooperative and competitive learning problems by using different reward structures for each agent. Therefore, during training, each agent learns a centralized critic based on observations and actions of all agents. But for execution, each agent acts locally. In order to implement MDDPG, we make the human and the robot only use their local information, respectively. Specifically, we separate state  $x_k$  into  $z_k$  and  $x_k^- = [\Delta P_k, \Delta D_k]^T$ , signifying local observations for human and prosthesis, respectively. Therefore, the local actors  $\pi_v$  and  $\pi_u$  take local observations to generate actions  $v_k$  and  $u_k^-$ , respectively. Additionally we formulate stage costs for human  $U_v$  and prosthesis  $U_u$ , respectively as

$$\begin{aligned} U_v &= z_k^T R_z z_k + R_v v_k^2 + \mu h_k^2, \\ U_u &= (x_k^-)^T (R_{x-}) x_k^- + u_k^{-T} R_u u_k^-, \end{aligned} \quad (31)$$

where  $R_v$  and  $R_u$  have the same weights as our cMARL method,  $R_{x-} = \text{diag}(1, 1)$  only takes the respective weights for prosthesis in  $R_x$ , and  $R_z = \text{diag}(0.25, 0.25)$  which also, only extracts the weights for human in  $R_x$ .

During training, the actor and critic back-propagate their respective squared errors below to update their weights.

The prediction errors for human actor  $e_{a_v,k}$  and prostheses actor  $e_{a_u,k}$ , respectively are

$$\begin{aligned} e_{a_v,k} &= \frac{1}{2}(Q_{v,i}(x_k, v_k, u_k^-))^2, \\ e_{a_u,k} &= \frac{1}{2}(Q_{u,i}(x_k, v_k, u_k^-))^2, \end{aligned} \quad (32)$$

where  $Q_{v,i}$  and  $Q_{u,i}$  are respectively the  $Q$  values of human and prosthesis during the  $i$ th iteration.

The prediction errors for the human critic  $Q_v$  and prosthesis critic  $Q_u$  are formulated based on their respective Bellman-like errors,

$$\begin{aligned} \epsilon_{v,k} &= U_v + \gamma Q_{v,i}(x_{k+1}, \pi_{v_i}(z_{k+1}), \pi_{u_i}(x_{k+1}^-)) - Q_{v,i+1}(x_k, v_k, u_k^-), \\ \epsilon_{u,k} &= U_u + \gamma Q_{u,i}(x_{k+1}, \pi_{v_i}(z_{k+1}), \pi_{u_i}(x_{k+1}^-)) - Q_{u,i+1}(x_k, v_k, u_k^-). \end{aligned} \quad (33)$$

The critic neural networks  $Q_v$  and  $Q_u$  are trained to minimize  $e_{v,k} = \frac{1}{2}\epsilon_{v,k}^2$  and  $e_{u,k} = \frac{1}{2}\epsilon_{u,k}^2$ , respectively.

**Network architecture.** As figure12 shows, each agent in MADDPG contain independent critic network and actor network. Our code is modified upon the public MADDPG code to fit in our environment. To fair comparison, the shape of network which are 3 layer MLP. The stage cost was defined in Eq. 14. The corresponding error functions were defined in Eq.32 and Eq.33.

**Training parameters.** To fair comparison, MADDPG use the same hyperparameter as cMARL which the learning rate of  $\eta = 1 \times 10^{-2}$  was used to train both critic and actor network. The optimization target error was  $\epsilon = 1 \times 10^{-3}$ . The discounted factor  $\gamma = 0.95$ . The convergence criteria are same as cMARL.

## D.5 Run time comparison

We use Matlab for all implementation and evaluation all of our methods using our computer consisting of a AMD 5900x CPU. The simulation environment was built upon OpenSim 3.3 simulator.

|                | cMARL | dHDP | COMA | MADDPG |
|----------------|-------|------|------|--------|
| Time (seconds) | 2285  | 2405 | 2300 | 2525   |

Table D.5 shows the total training time of a single trial. In general, we observe that the training time is bottle-necked by the OpenSim forward dynamic simulation. Simulation time of each gait was significantly greater than the computing time of each weights updating ( $\approx 980\%$  run time on sim,  $\approx 2\%$  on weight updates)

## D.6 Optimizer

In this study, we use a customized SGD with back-propagation optimizer to train the weights in the actor and critic MLP networks. As described in Appendix D, the algorithm is based on an actor-critic structure, the direct heuristic dynamic programming (dHDP) [36].

### D.6.1 Critic network

The critic network is a three-layer MLP. It takes a state-action pair as input  $x \in \mathbb{R}^{m \times 1}$  and  $u \in \mathbb{R}^{n \times 1}$ . The approximated cost to go value:

$$\hat{Q}_i(x, u) = W_{c2,i} \varphi \left( W_{c1,i} [x^T, u^T]^T \right) \quad (34)$$

where  $W_{c1,i} \in \mathbb{R}^{6 \times m+n}$  was the weight matrix between the input layer and the hidden layer, and  $W_{c2,i} \in \mathbb{R}^{1 \times 6}$  was the weight matrix between the hidden layer and the output layer at  $i$ th update. And,

$$\eta_{c1} = W_{c1,i} [x^T, u^T]^T \quad (35)$$

$$h_{c1} = \varphi(\eta_{c1}) \quad (36)$$

$$\varphi(\eta) = \frac{1 - \exp(-\eta)}{1 + \exp(-\eta)} \quad (37)$$

where  $\varphi(\cdot)$  was the tan-sigmoid activation function, and  $h_{c1}$  was the hidden layer output.

The prediction error  $e_c \in \mathbb{R}$  of the critic network at  $k$  steps can be written as.

$$e_{c,k} = \gamma \hat{Q}_i(x_{k+1}, \pi(x_{k+1})) - [\hat{Q}_{i+1}(x_k, u_k) - U(x_k, u_k)] \quad (38)$$

To correct the prediction error, the weight update objective was to minimize the squared prediction error  $E_c$ , denoted as

$$E_{c,k} = \frac{1}{2} (e_{c,k})^2 \quad (39)$$

The weight update rule for the CNN was a gradient-based adaptation given by

$$W_{i+1} = W_i + \Delta W_i \quad (40)$$

The weight updates of the hidden layer matrix  $W_{c2}$  were

$$\begin{aligned} \Delta W_{c2,i} &= l_c \left[ -\frac{\partial E_c}{\partial W_{c2}} \right] \\ &= l_c \left[ -\frac{\partial E_c}{\partial e_c} \frac{\partial e_c}{\partial \hat{Q}} \frac{\partial \hat{Q}}{\partial W_{c2}} \right] \end{aligned} \quad (41)$$

The weight updates of the input layer matrix  $W_{c1}$  were

$$\begin{aligned} \Delta W_{c1,i} &= l_c \left[ -\frac{\partial E_c}{\partial W_{c1}} \right] \\ &= l_c \left[ -\frac{\partial E_c}{\partial e_c} \frac{\partial e_c}{\partial \hat{Q}} \frac{\partial \hat{Q}}{\partial h_{c1}} \frac{\partial h_{c1}}{\partial \eta_{c1}} \frac{\partial \eta_{c1}}{\partial W_{c1}} \right] \end{aligned} \quad (42)$$

where  $l_c > 0$  was the learning rate of the critic network.

### D.6.2 Actor network

The actor network is a three-layer MLP. It takes a state as input  $x \in \mathbb{R}^{m \times 1}$ . The action output is  $u \in \mathbb{R}^{n \times 1}$

$$u = \varphi(W_{a2} * \varphi(W_{a1}x)) \quad (43)$$

where  $W_{a1} \in \mathbb{R}^{6 \times m}$  and  $W_{a2} \in \mathbb{R}^{n \times 6}$  were the weight matrices, and  $\varphi(\cdot)$  was the tan-sigmoid activation function of the hidden layer and output layer. the prediction error of actor is

$$e_{a,k} = \frac{1}{2} (Q_i(x_k, u_k))^2 \quad (44)$$

The squared prediction error  $E_a, k$ , denoted as

$$E_{a,k} = \frac{1}{2} (e_{a,k})^2 \quad (45)$$

Similarly, the weight matrix was updated based on gradient descent:

$$W_{i+1} = W_i + \Delta W_i \quad (46)$$

The weight updates of the hidden layer matrix  $W_{a2,i}$  were

$$\begin{aligned} \Delta W_{a2,i} &= l_a \left[ -\frac{\partial E_a}{\partial W_{a2,i}} \right] \\ &= l_a \left[ -\frac{\partial E_a}{\partial e_a} \frac{\partial e_a}{\partial \hat{Q}} \frac{\partial \hat{Q}}{\partial h_{c1}} \frac{\partial h_{c1}}{\partial \eta_{c1}} \frac{\partial \eta_{c1}}{\partial u} \frac{\partial u}{\partial W_{a2,i}} \right] \end{aligned} \quad (47)$$

The weight updates of the input layer matrix  $W_{a1,i}$  were

$$\begin{aligned} \Delta W_{a1,i} &= l_a \left[ -\frac{\partial E_a}{\partial W_{a1,i}} \right] \\ &= l_a \left[ -\frac{\partial E_a}{\partial e_a} \frac{\partial e_a}{\partial \hat{Q}} \frac{\partial \hat{Q}}{\partial h_{c1}} \frac{\partial h_{c1}}{\partial \eta_{c1}} \frac{\partial \eta_{c1}}{\partial u} \frac{\partial u}{\partial h_{a2}} \frac{\partial h_{a2}}{\partial \eta_{a1}} \frac{\partial \eta_{a1}}{\partial W_{a1,i}} \right] \end{aligned} \quad (48)$$

where  $l_a > 0$  is the learning rate of the actor.

## Appendix E Performance evaluation

### E.1 Training and evaluation

A trial consists of 300 gait cycles of continuous walking, which is chosen according to published results based on single-agent design studies using simulations and human experiments. Each gait cycle will generate one data tuple  $(x_k, u_k, v_k, U_v, U_u, x_{k+1})$ . A trial is considered successful if all state variables in  $x_k$  reach their respective error tolerance bound (Appendix A.4, Table 2, bottom row). Additionally, one gait phase at a time, if 8 out of 10 consecutive gaits meet the state error tolerance bound condition, training has converged. If all 4 phases have converged within 300 gait cycles, the trial is a success. Results reported in this paper are based on 16 trials of OpenSim simulations for each study below.

Each of the three approaches used the same random seeds during training and evaluation. Evaluation trials are performed on 5 randomly selected ones out of the 16 training trials, and evaluations are conducted every 2 gaits during the first 50 gaits and then every 10 gaits afterwards, each using the latest policy at the time of evaluation. Due to very low success rate of the tailored MADDPG method and very low chance of retrieving a successful policy (Figure 3, grey lines), also that its current implementation may be viewed as a decomposed COMA, we have removed MADDPG from evaluation.

### E.2 Evaluation metrics

In order to ensure that amputee subjects walk safely and continuously, we consider several performance metrics: 1) This is an optimal control problem and thus the objective is to minimize regulation cost (close to 0 is better). 2) Peak angle can directly reflect amputee safety, as small peak angle difference prevents amputee stumbling in swing phase and unbalance in stance phase (close to 0 is better). 3) Symmetry in walking can prevent secondary injury to the amputee (close to 0 is better). 4) Faster learning in terms of fewer tuning steps is practically important to amputees wearing a prosthesis (fewer steps is better). 5) High success rate boosts amputees' confidence to our method and thus perform more natural walking pattern (higher is better). 6) Standard division for each metrics above are a common measure in RL (smaller is better).

1) This is an optimal control problem and thus the objective is to minimize regulation cost, which is unlike game problems to achieve maximum scores. As such, learning convergence is based on the same criteria in Appendix Table 2, We thus can compare learning and success rates by reaching the same convergence level

2) Additionally, maintaining human-prosthesis stability during walking is a must and is ensured in our design (Appendix A.4 for safety consideration). We consider this is a qualitative measure, which is partially reflected in 2) success rate.

3) Faster learning means less tuning steps which is practically important to amputees wearing a prosthesis. They will use less effort and high success rate boosts amputees' confidence and thus natural walking patterns. Symmetry is to prevent secondary injury, while variance reduction is a common measure in RL. As a reference point, in current clinical practice, a highly skilled prosthesis needs to spend hours and multiple clinic visits to arduously hand-tune the impedance parameters for each user for a small number of walking tasks (most of which considered in our study).

Note that Energy consumption measure may not be appropriate for amputees. This measurement is too slow and may not be reliable for human-prosthesis control updates (requires X10 minutes per sample) as it is susceptible to various contamination due to several confounding factors stemming from a person's physical, physiological, and psychological condition. Additional uncertainty in using energy cost for amputee subjects can come from prosthesis fitting and related conditions.

Even though some applications such as exoskeleton control (for healthy subjects) use energy as performance goal, it is chosen rather intuitively as it is unclear whether it is influenced by human and/or robot. One important note is that metabolic cost has not been successfully demonstrated in the control of wearable robotic prostheses in walking [84].

## Appendix F Summary of common approaches to shared autonomy

The human-prosthesis problem under our consideration falls into the area of physical human-robot interaction (pHRI) as the human and the robotic prosthesis are in direct contact at all times. It is not, however, the extensively studied pHRI problem archetype (e.g., cooperative object manipulation, human operating in a remote environment), wherein interactions are usually mediated by a third object.

For similar reasons, our pHRI problem is different in several important aspects from the scope of shared autonomy problems. We illustrate below why the problem cannot be solved by existing approaches in the literature.

1) Cross-training, such as [46] in which the cooperative tasks of placing screws and drilling screws are switched between the human and robot, cannot be applied to the human-prosthesis problem. The human and prosthesis have distinct (cooperative) roles, and there is no way to partition the walking task for role interchange.

2) Bounded memory adaptation, used in a cooperative table clearing task [47] and a moving-a-table-through-door task [85], is also not applicable. In these studies, the control was designed with the robot having specific preferences and adapting based on direct human input. In our application, the exact numerical values of the impedance parameters are not intuitive for the human to edit/update directly.

3) The predict and blend approach [86, 48] to enable robot autonomy and user input or blend the two is also problematic in this setting. In these studies, the human has the lead role (e.g. specifying what pose to catch or which object to catch), and robot’s role is to facilitate completing the task. In locomotion, there is no clear single goal from the perspective of the human, and it is difficult to furnish user inputs which substantively inform the controller to improve gait synchronization (cf. Point P4 of Common Issues).

4) Lastly, model-free deep RL [49], where shared autonomy is achieved by training an end-to-end mapping from states and user inputs to agent action choices, is not conformable to our problem either. Fundamentally, in these methods the robot’s role is reactive to the states/controls generated by the human, and attention is not paid to the human learning and its intrinsic coupling to the robot learning. In locomotion, human and robot are equal partners and learn simultaneously.

As shown, our pHRI control problem does not fit into those extensively studied frameworks. Additionally, the first 3 approaches require a known dynamic model, a set of possible goals, and a known user policy under a specific goal. These are too restrictive or unrealistic for human-prosthesis problem. Modeling a human-robotic prosthesis system is challenging if not at all possible. Neither do we know how human and a robotic leg interact. Even though the 4th approach does not require a model as it rely on big data, it is still not feasible for amputee subjects as big data for individual subjects is not available, and scaling from 12 control to hundreds if we are to design controls of knee, ankle and hip joints would be unscalable.

## Appendix G Publicly Available Code

Code for creating the human-robot environment and the original dHDP actor-critic learning algorithm are provided at <https://github.com/JennieSi-Lab-RLOC/NeurIPS2022/tree/main/OpenSim%20Model>

The following references go along with Openreview discussion:

- [15] Minhan Li, Yue Wen, Xiang Gao, Jennie Si, and He Helen Huang. Towards expedited impedance tuning of a robotic prosthesis for personalized gait assistance by reinforcement learning control. arXiv preprint arXiv:2006.06518, 2020.
- [16] Yue Wen, Minhan Li, Jennie Si, and He Huang. Wearer-prosthesis interaction for symmetrical gait: a study enabled by reinforcement learning prosthesis control. *IEEE transactions on neural systems and rehabilitation engineering*, 28(4):904–913, 2020.
- [37] Yue Wen, Jennie Si, Xiang Gao, Stephanie Huang, and He Helen Huang. A new powered lower limb prosthesis control framework based on adaptive dynamic programming. *IEEE transactions on neural networks and learning systems*, 28(9):2215–2220, 2016.
- [38] Yue Wen, Jennie Si, Andrea Brandt, Xiang Gao, and He Huang. Online reinforcement learning control for the personalization of a robotic knee prosthesis. *IEEE transactions on cybernetics*, 2019.
- [39] Wentao Liu, Junmin Zhong, Ruofan Wu, Bretta L Fylstra, Jennie Si, and He Helen Huang. Inferring human-robot performance objectives during locomotion using inverse reinforcement learning and inverse optimal control. *IEEE Robotics and Automation Letters*, 2022.
- [40] Yue Wen, Andrea Brandt, Ming Liu, He Huang, and Jennie Si. Comparing parallel and sequential control parameter tuning for a powered knee prosthesis. In *2017 IEEE International Conference on Systems, Man, and Cybernetics (SMC)*, pages 1716–1721. IEEE, 2017.
- [41] Yue Wen, Andrea Brandt, Jennie Si, and He Helen Huang. Automatically customizing a powered knee prosthesis with human in the loop using adaptive dynamic programming. In *2017 International Symposium on Wearable Robotics and Rehabilitation (WeRob)*, pages 1–2. IEEE, 2017.
- [42] Xiang Gao, Jennie Si, Yue Wen, Minhan Li, and He Huang. Reinforcement learning control of robotic knee with human-in-the-loop by flexible policy iteration. *IEEE Transactions on Neural Networks and Learning Systems*, 2021.
- [43] Minhan Li, Xiang Gao, Yue Wen, Jennie Si, and He Helen Huang. Offline policy iteration based reinforcement learning controller for online robotic knee prosthesis parameter tuning. In *2019 International Conference on Robotics and Automation (ICRA)*, pages 2831–2837. IEEE, 2019.
- [44] Yue Wen, Xiang Gao, Jennie Si, Andrea Brandt, Minhan Li, and He Helen Huang. Robotic knee prosthesis real-time control using reinforcement learning with human in the loop. In *International Conference on Cognitive Systems and Signal Processing*, pages 463–473. Springer, 2018.
- [45] Yue Wen, Ming Liu, Jennie Si, and He Helen Huang. Adaptive control of powered transfemoral prostheses based on adaptive dynamic programming. In *2016 38th Annual International Conference of the IEEE Engineering in Medicine and Biology Society (EMBC)*, pages 5071–5074. IEEE, 2016.
- [46] Ruofan Wu, Minhan Li, Zhikai Yao, Jennie Si, et al. Reinforcement learning enabled automatic impedance control of a robotic knee prosthesis to mimic the intact knee motion in a co-adapting environment. arXiv preprint arXiv:2101.03487, 2021.
- [60] Hogan, Neville. "Impedance control: An approach to manipulation." 1984 American control conference. IEEE, 1984.
- [62] Taga, Gentaro, Yoko Yamaguchi, and Hiroshi Shimizu. "Self-organized control of bipedal locomotion by neural oscillators in unpredictable environment." *Biological cybernetics* 65.3 (1991): 147-159.
- [71] M Jason Highsmith, Casey R Andrews, Claire Millman, Ashley Fuller, Jason T Kahle, Tyler D Klenow, Katherine L Lewis, Rachel C Bradley, and John J Orriola. Gait training interventions for lower extremity amputees: a systematic literature review. *Technology & Innovation*, 18(2-3):99–113, 2016.
- [72] Alberto Esquenazi. Gait analysis in lower-limb amputation and prosthetic rehabilitation. *Physical Medicine and Rehabilitation Clinics*, 25(1):153–167, 2014.
- [73] George NS Marinakis. Interlimb symmetry of traumatic unilateral transtibial amputees wearing two different prosthetic feet in the early rehabilitation stage. *Journal of rehabilitation research and development*, 41(4):581–590, 2004.

- [79] Geyer, Hartmut, Andre Seyfarth, and Reinhard Blickhan. "Positive force feedback in bouncing gaits?." *Proceedings of the Royal Society of London. Series B: Biological Sciences* 270.1529 (2003): 2173-2183.
- [80] Shamaei, Kamran, Gregory S. Sawicki, and Aaron M. Dollar. "Estimation of quasi-stiffness of the human knee in the stance phase of walking." *PloS one* 8.3 (2013): e59993.
- [81] Minhan Li et al. Learning based control adaptation of robotic knee prostheses. 2022
- [86] Wentao Liu, Ruofan Wu, Jennie Si, and He Huang. A new robotic knee impedance control parameter optimization method facilitated by inverse reinforcement learning. *IEEE Robotics and Automation Letters*, pages 1–8, 2022.
- [89] Zhang, Juanjuan, et al. "Human-in-the-loop optimization of exoskeleton assistance during walking." *Science* 356.6344 (2017): 1280-1284.
- [105] Cara Gonzalez Welker, Alexandra S Voloshina, Vincent L Chiu, and Steven H Collins. Short-comings of human-in-the-loop optimization of an ankle-foot prosthesis emulator: a case series. *Royal Society open science*, 8(5):202020, 2021.
- [106] Tyler R Clites, Max K Shepherd, Kimberly A Ingraham, Leslie Wontorcik, and Elliott J Rouse. Understanding patient preference in prosthetic ankle stiffness. *Journal of neuroengineering and rehabilitation*, 18(1):1–16, 2021.
- [107] Abbas Alili, Varun Nalam, Minhan Li, Ming Liu, Jennie Si, and He Helen Huang. User controlled interface for tuning robotic knee prosthesis. In *2021 IEEE/RSJ International Conference on Intelligent Robots and Systems (IROS)*, pages 6190–6195. IEEE, 2021.
- [108] Kejun Li, Maegan Tucker, Erdem Bıyık, Ellen Novoseller, Joel W Burdick, Yanan Sui, Dorsa Sadigh, Yisong Yue, and Aaron D Ames. Roial: Region of interest active learning for characterizing exoskeleton gait preference landscapes. In *2021 IEEE International Conference on Robotics and Automation (ICRA)*, pages 3212–3218. IEEE, 2021.
- [109] Maegan Tucker, Ellen Novoseller, Claudia Kann, Yanan Sui, Yisong Yue, Joel W Burdick, and Aaron D Ames. Preference-based learning for exoskeleton gait optimization. In *2020 IEEE international conference on robotics and automation (ICRA)*, pages 2351–2357. IEEE, 2020
